# Supplementary material for: Toxigenic Clostridium perfringens Isolated from At-Risk Paediatric Inflammatory Bowel Disease Patients
Source: PubMed Central journal article supplement (PMC11302968; doi:10.1093/ecco-jcc/jjae016), 2024-01-24
Supplement: jjae016_suppl_supplementary_material.pdf [file jjae016_suppl_supplementary_material.pdf]

## Supplementary Information

### **Toxigenic *Clostridium perfringens* isolated from at-risk paediatric inflammatory bowel disease patients**

James Kuo<sup>1</sup>, Jasmina Uzunovic<sup>2</sup>, Amanda Jacobson<sup>3</sup>, Michelle Dourado<sup>4</sup>, Sarah Gierke<sup>5</sup>, Manohary Rajendram<sup>1</sup>, Daniela Keilberg<sup>1</sup>, Jordan Mar<sup>6</sup>, Emily Stekol<sup>7</sup>, Joanna Curry<sup>7</sup>, Sofia Verstraete<sup>7</sup>, Jessica Lund<sup>8</sup>, Yuxin Liang<sup>8</sup>, Fiona B. Tamburini<sup>6</sup>, Natalie S. Omattage<sup>1</sup>, Matthieu Masureel<sup>9</sup>, Steven T. Rutherford<sup>1</sup>, David H. Hackos<sup>4</sup>, Man-Wah Tan<sup>1</sup>, Allyson L. Byrd<sup>10</sup>, Mary E. Keir<sup>6</sup>, Elizabeth Skippington<sup>1,2</sup>, Kelly M. Storek<sup>1,\*</sup>

<sup>1</sup>Department of Infectious Diseases and Host-Microbe Interactions, Genentech Inc., South San Francisco, CA, USA

<sup>2</sup>Department of Bioinformatics, Genentech Inc., South San Francisco, CA, USA

<sup>3</sup>Department of Immunology Discovery, Genentech Inc., South San Francisco, CA, USA

<sup>4</sup>Department of Neuroscience, Genentech Inc., South San Francisco, CA, USA

<sup>5</sup>Department of Pathology, Genentech Inc., South San Francisco, CA, USA

<sup>6</sup>Department of Human Pathobiology and OMNI Reverse Translation, Genentech Inc., South San Francisco, CA, USA

<sup>7</sup>Department of Pediatrics, University of California San Francisco Benioff Children's Hospital, San Francisco, CA, 94158, USA.

<sup>8</sup>Department of Microchemistry, Proteomics & Lipidomics, Genentech Inc., South San Francisco, CA, USA

<sup>9</sup>Department of Structural Biology, Genentech Inc., South San Francisco, CA, USA

<sup>10</sup>Department of Cancer Immunology, Genentech Inc., South San Francisco, CA, USA

\*Correspondence: [storek.kelly@gene.com](mailto:storek.kelly@gene.com). 408-309-7014

## SUPPLEMENTARY MATERIALS and METHODS

### *Study Design and Patients*

A prospective case-control study of patients aged 2 years and older undergoing esophagogastroduodenoscopy (EGD) and colonoscopy as part of clinical care at UCSF Benioff Children's Hospital Mission Bay was conducted as approved by the UCSF Institutional Review Board. Patients who had taken antibiotics, proton pump inhibitors (PPI), or H2-receptor antagonists within two weeks of procedure, with current parasites (*Cryptosporidium*, *Entamoeba histolytica*, *Giardia*), bacteria (*C. difficile*, *Campylobacter*, *E. coli* O157, Enterotoxigenic *E. coli* (ETEC) LT/ST, *Salmonella*, *Shigella*, shiga toxin-producing *E. coli* (STEC) stx1/stx2, *Vibrio cholera*), and viruses (adenovirus 40/41, Norovirus GI/GII, Rotavirus A) in the stool culture as detected by PCR or stool culture + Ova and Parasites (O&P) stool test within two months of procedure, history of transplant (solid organ or HSCT), history of gastric or intestinal bypass surgery, current motility disorder, advanced comorbid conditions, inability to stop high-risk medications such as antiplatelets or anticoagulants, or known immunodeficiencies, malignancies, or human immunodeficiency virus were excluded from this study.

Patients were contacted via phone or email one to two weeks before their scheduled procedure to have a complete consent discussion with the study team. Once consented, stool collection kits were mailed to the patient's home to facilitate stool collection ahead of their scheduled cleanout. Patients were instructed to collect stool in OMNIgene-GUT OMR-200 tubes (DNA Genotek) within 1-3 days of their procedure. Patients were prepared for a standard endoscopy with MiraLAX and Dulcolax. During the procedure, two mucosal biopsies were obtained according to standard clinical practice from the duodenum or jejunum, ileum, and colon and placed in BIOME-Preserve anaerobic microbiome tubes. When present, biopsies were obtained from diseased areas of the colon.

Demographic data (sex, race, ethnicity, date of birth), height and weight at time of procedure, nicotine exposure, disease information (UC, CD, other GI disorder, or none), and medication history (including antibiotic exposure) were collected. Abnormalities macroscopically and microscopically at the time of the endoscopy were noted.

### *Culturing and processing patient samples*

Typically from each patient was collected (a) two biopsies each from three sections (duodenum, ileum, colon) stored in Anaerobic Tissue Transport Media (Anaerobe Systems AS-919), (b) pre-biopsy colonic phosphate buffer wash (stored in BIOME-Preserve Anaerobic

Microbiome Collection tubes (Anaerobe Systems)), and (c) stool collected before the procedure (also stored in BIOME-Preserve tubes or OMNIgene-GUT OMR-200 tubes (DNA Genotek). Samples were transported within 4 hours of the procedure and processed — culturing the biopsies and freezing the remaining samples. Biopsies were transferred to 1-2 mL of PBS in a gentleMACS M-tube (Miltenyi Biotec) using a 1 mL pipette tip in an anaerobic chamber (Coy, vinyl). M-tubes were sealed tightly, removed from the anaerobic chamber and homogenized using a gentleMACS Dissociator (Miltenyi Biotec) for 55 seconds (RNA\_01.01 setting) 1-3 times. The tubes were then brought back into the anaerobic chamber and processed for culturing.

Culturing was with 1 mL media in 2 mL 96-deepwell polypropylene plates (Corning 3960). To each 1 mL media, ~50  $\mu$ L of homogenized biopsy slurry was added. Plates were sealed with AeraSeal films (Excel Scientific BS-25) and incubated at 37°C anaerobically. After 2-3 days, the plates were passaged by transferring 10  $\mu$ L to a fresh 1 mL of media, then grown an additional 2-3 days. After each round of growth, cultures were saved as glycerol plates (50  $\mu$ L culture + 50  $\mu$ L of 50% glycerol), neat plates (100  $\mu$ L culture), and DNA extraction plates (250  $\mu$ L culture). After the second growth passage, cultures were additionally processed as supernatant plates for in vitro assays, prepared by spinning down 300+  $\mu$ L of culture for 3,000 x g for 5-10 min, then filtering supernatant with a 0.2  $\mu$ m PES AcroPrep Advance 96-well filter plate (PALL 8019), spinning 1,500 x g for 2 min. Note that some supernatants clogged the filter. Supernatants were collected in polystyrene 96-well round bottom plates (Corning 3788). Plates were sealed with aluminum foil covers (Excel Scientific FCS-25) and stored at -80°C.

Culturing media was selected based on previous efforts<sup>1</sup>, including Mega media<sup>2</sup>, simulated intestinal efflux media (SIEM)<sup>3</sup>, simulator of the human intestinal microbial ecosystem (SHIME) media<sup>4</sup>, and a DMEM-based media with mucin and pectin for chip culture<sup>5</sup>. Notably, another recent effort culturing from human samples also chose BHI<sup>6</sup>.

### *C. perfringens* culturing and genetics

To increase our odds of isolating *C. perfringens*, we selected cultures with the highest *C. perfringens* relative abundances for colony plating on sulfite-containing plates and used conditions to select for spores, like aerobic ethanol treatment<sup>7</sup>.

Insertional mutants were generated using the Group II intron system, or “ClosTron”, developed previously<sup>8</sup>. We created plasmids based on what was used recently<sup>9</sup> containing a thiolase-promoter driven erythromycin resistance (*ermB*) gene and a 309 bp variable intron targeting region. PCR was performed using Q5 Hot Start Master Mix (New England BioLabs,

M0494), Gibson assemblies using NEBuilder HiFi DNA Assembly mix (New England BioLabs, E2621), and plasmid cloning was in *E. coli* TOP10 chemically competent cells (Invitrogen). Plasmids were transformed by electroporation into *E. coli* CA434 for conjugation. Overnight cultures of the donor *E. coli* and recipient *C. perfringens* were mixed in a 2:1 ratio (1 mL + 0.5 mL) and spun down 3,000 x g for 2 min. The supernatant was removed to leave about 20-30  $\mu$ L, which was then spotted on a tryptic soy broth (TSB) plate for 24-48 h conjugation at 37°C anaerobically. Spots were scraped into PBS and plated onto selection agar plates, BHI-YH + 15  $\mu$ g/mL thiamphenicol + 250  $\mu$ g/mL cycloserine, then restreaked onto BHI-YH + 10  $\mu$ g/mL erythromycin + 250  $\mu$ g/mL cycloserine agar plates. Mutants were checked by sequencing.

#### *DNA Extraction and 16S\_V4 sequencing, data processing, and analysis*

Microbial DNA was extracted from ~200  $\mu$ L of culture using DNeasy QIAcubeHT Powersoil Pro (Qiagen) for Patients 1-3 or DNeasy 96 PowerSoil Pro (Qiagen) Patients 4-9. Biopsies were also directly extracted using the single tubes QIAamp PowerFecal Pro DNA kit (Qiagen). Extracted DNA was used for 16S\_V4 PCR using barcoded reverse primers<sup>10</sup>. PCR was done with Takara Ex Taq DNA Polymerase, Hot Start version (RR006B) and Roche BSA (#10711454001) as previously described<sup>11</sup>.

16S libraries were pooled and sequenced following Illumina's metagenomics workflow. The library pool was denatured with 0.2 N NaOH for 5 mins and diluted to 8 pM with the Illumina buffer HT1. The Illumina control library PhiX (denatured and diluted) was spiked into the diluted denatured library at 5%. The mixture was heat denatured at 96°C for 2 minutes, chilled in an ice-water bath for 5 minutes, then added to the MiSeq cartridge along with custom primers spiked into the corresponding Illumina primer wells and sequenced paired end 200 cycles with a 12 base i7 index. Microbiome sequence data is available from The European Genome-phenome Archive (EGA, <https://ega-archive.org/>) under Study ID EGAS00001007538.

QIIMEv2019.7 was used to process the 16S-V4 rRNA gene sequence data as previously described<sup>12,13</sup>. Briefly, raw sequence data was demultiplexed, read trimming was performed to remove regions of low sequence quality, and paired-end reads were denoised, dereplicated, and chimera filtered with DADA2<sup>14</sup>. Taxonomy was assigned based on the V4 region of the Genome Taxonomy Database 16S rRNA gene sequence database (r202)<sup>15,16</sup>. Resulting abundance tables were rarefied and data was visualized using MicrobiomeExplorer<sup>17</sup>.  $\beta$ -diversity measures were calculated in QIIMEv2019.7<sup>12,13</sup>. All statistical analyses were conducted in the R programming language (v4.3.0) (R Core Team. R: A language and environment for statistical computing. Vienna: Austria; 2020.). Bray-Curtis distance matrices

were visualized via non-metric multidimensional scaling (NMDS) and permutational multivariate analysis of variance (PERMANOVA) was used to determine relationships between metadata (e.g., sample location) and bacterial microbiota composition using the *adonis* function from the *vegan* package (Oksanen J, Simpson G, Blanchet F, Kindt R, Legendre P, Minchin P, et al. *vegan: Community Ecology Package*. R package version 2.6-4. 2022.). Plots were generated in R v4.3.0 using packages from the tidyverse v2.0.0 suite (*dplyr* v1.1.3, *ggplot2* v3.4.3)<sup>18</sup>.

#### *Oxford Nanopore whole-genome sequencing and analysis*

Genomic DNA was sequenced either individually on MinION flow cells or multiplexed on PromethION flow cells. DNA quality was determined by Nanodrop (Thermo Fisher Scientific) to ensure an OD<sub>260</sub>/OD<sub>280</sub> of 1.8-2.0 and an OD<sub>260</sub>/OD<sub>230</sub> of 2.0–2.2 for all library input. DNA was quantified using the Qubit dsDNA BR assay kit (Thermo Fisher Scientific). DNA size was determined using the Genomic DNA ScreenTape on TapeStation 4200 (Agilent Technologies). For library preparation, the Ligation Sequencing Kit (Oxford Nanopore Technologies, SQK-LSK109) was used with an input of 1 µg of genomic DNA. Sample multiplexing was performed using 500 ng of end-repaired DNA with the Native Barcoding Expansion Kit (Oxford Nanopore Technologies, EXP-NBD104). 400 ng of library from each sample was sequenced on an R9.4 flow cell on a MinION device to generate fast5 files that were subsequently converted to fastq files using Guppy 5.0.11 (Oxford Nanopore Technologies). An average of 350 ng of multiplexed library pool of 3 or 4 samples was sequenced on an R9.4 flow cell on a PromethION device and base-called in real time using Guppy 5.1.12.

Draft metagenomes were assembled using metaFlye 2.8.3-b1695 with the ‘–meta–plasmids’ option<sup>19</sup>. To identify virulence genes, the assembled metagenomes were compared against the VFDB<sup>20</sup>, using ABRicate v 0.5 (<https://github.com/tseemann/abricate>) with default parameter settings. BLAST high-scoring segment pairs (HSPs) satisfying >80% sequence identity were considered putative evidence for presence of a virulence factor protein gene. Contigs putatively encoding virulence factors were assigned species labels via BLASTn searches against the NCBI non-redundant database. Long-read data is available from NCBI under BioProject ID PRJNA1043401 with BioSample accessions SAMN38369910-18.

#### *Whole-genome sequencing and analysis (Illumina)*

Quality of the genomic DNA was determined using the Genomic DNA ScreenTape and TapeStation 4200 (Agilent Technologies). Genomic DNA was quantified using the Qubit dsDNA BR assay kit (Thermo Fisher Scientific). For library preparation, the Nextera DNA Flex kit

(Illumina) was used with an input of 100 ng of genomic DNA. The resulting libraries were multiplexed and sequenced on NovaSeq (Illumina) to generate 5 million paired end 75 base pair reads for each sample.

Draft isolate genomes were assembled from Illumina short read data using SPAdes v3.13.1 with default parameter settings<sup>21</sup>, and BRIG was used to visually compare them<sup>22</sup>. Gene calling was performed using Prokka v1.12<sup>23</sup> and genome quality assessed using CheckM v1.2.2<sup>24</sup>. Roary with default parameter settings<sup>25</sup> was used to produce a core gene alignment of *C. perfringens* genomes sequenced in the current study, as well as publicly available genomes. The *C. perfringens* phylogeny was estimated with RAxML v8 using the generalized time-reversible (GTR) model with gamma correction for among-site rate variation and 10 starting trees<sup>26</sup>. Support for nodes was assessed using 500 bootstrap replicates. All *C. perfringens* genome data is available from NCBI under BioProject ID PRJNA1043401 with BioSample accessions SAMN38338936-40.

#### *Red blood cell lysis assays*

Whole blood from healthy subjects was obtained with Genentech's internal donor program, Samples for Science, following the approved IRB protocol (20080040) study specifications. Bacterial supernatants to 10% were mixed with 2% whole blood in phosphate-buffered saline to a final volume of 200  $\mu$ L in a 96-well plate. Plates were incubated at 37°C for the specified amount of time, and for 4 h for single point readings. At each time point, 50  $\mu$ L of supernatant was removed and mixed with 50  $\mu$ L of PBS. The 100% lysis control was 0.5% Triton X-100. Absorbance at 450 nm was subtracted from the 650 nm absorbance.

#### *Toxin Purification, Protein Gels, Western Blots*

Toxins were expressed with 6xHis and SUMO cleavage tags in *E. coli* grown in Terrific Broth. Cells were resuspended in lysis buffer (50 mM Tris pH 7.5, 300 mM NaCl, 15% glycerol, 5 mM imidazole, 5 mM MgCl<sub>2</sub>, 1 mM TCEP (Tris(2-carboxyethyl)phosphine)) with Roche cOmplete Ultra EDTA-free protease inhibitor (5892970001) and sonicated 3x 1 min (1 s on, 1 s off). The lysates were incubated with AmMag Ni resin magnetic beads (Genscript L00776). Resin was incubated with 50 mM Tris pH 7.5, 300 mM NaCl, 15% glycerol, 1 mM TCEP with 20 mM imidazole for washes and 250 mM imidazole for elution. The eluate was concentrated using a 10 kD Amicon Ultra centrifugal filter. Proteins were further purified by size exclusion chromatography at 4°C with a Superdex 200 Increase 10/300 GL column (GE Healthcare) and 20 mM HEPES pH 8.0 with 150 mM NaCl on an AKTA pure (Cytiva).

Protein SDS-PAGE was run with 10% Bis-Tris gels (Invitrogen, 1.0 mm for Western blots, or 1.5 mm otherwise) with MOPS running buffer. SimplyBlue SafeStain (Invitrogen) was used for visualization according to manufacturer instructions. Western blots were run using Invitrogen's iBlot 2 system: nitrocellulose membrane with primary anti-PFO polyclonal antibody (Invitrogen PA5-117550, 3 mg/mL, rabbit IgG) at 1:2500 and secondary anti-rabbit (Li-Cor IRDye 800CW, 1 mg/mL) at 1:5000. Commercial recombinant PFO protein (ATCC BTX-100) was used for comparison. For alpha-toxin, primary anti-alpha-toxin polyclonal antibody (3A4D10-23.0, Absolute Antibody, 1 mg/mL, rabbit IgG) was used at 1:2500.

#### *PCR and sequencing analysis of biopsy RNA*

Biopsy slurries in PBS were extracted using the AllPrep PowerViral DNA/RNA kit (Qiagen) with added on-column DNase I (Qiagen) step before final wash and elution. RNA was further treated with DNase using the TURBO DNA-free kit (Invitrogen AM1907) to ensure genomic DNA removal prior to cDNA prep by iScript Reverse Transcription (Bio-Rad). Both final cDNA and pre-reverse transcription RNA were used as template to run PCR analysis with Q5 Hot Start mix: 8  $\mu$ L reactions with 0.8  $\mu$ L template and 500 nM each primer (**Supplementary Table 11**). Thermocycling: 98°C for 2 min, 40x cycles [98°C for 10 sec, 58°C for 30 sec, 72°C for 30 sec], 72°C for 10 min, then hold at 4°C. The first PCR reaction was followed by a second using 0.8  $\mu$ L of the first PCR reaction as template. Reactions were visualized on 4% agarose E-gels (Invitrogen), and positive hits were Sanger sequenced to verify.

#### *CellTiter-Glo cell viability assays to estimate toxicity*

Mammalian cells were cultured using standard techniques in respective growth media in T75 or T150 flasks. Cell lines (T84, HT29, Caco2, Neuro-2a) were grown from in-house stocks originally passaged from ATCC. T84 cells were grown in RPMI 1640 with 10% heat-inactivated fetal bovine serum (FBS, R&D Systems), 2 mM Glutamax and Pen-Strep. HT29, Caco-2 and Neuro-2a cells were grown in DMEM with 10% FBS, 2 mM GlutaMAX and 1X Pen-Strep (Gibco). HUVEC cells (PromoCell) were grown in Endothelial Cell Growth Media (PromoCell). Cells were seeded at ~10,000 cells per well in white clearbottom tissue culture treated 96-well plates (Corning 3610) and grown an additional 1-3 days depending on the cell type. For human colonic organoid-derived monolayers, organoids were derived from deceased adult Donor Network West donors. Two donors were used in this study: a 36-year-old Asian Indian female and a 53-year-old White female. Organoids were grown in expansion media modified from previous protocols<sup>27</sup>. Organoids were dissociated to single cells and plated at a density of

100,000 per well on Collagen IV (Sigma C5533) coated plates. Organoid-derived monolayers were differentiated for 7 days. Media was swapped with low serum (0.25% FBS) or serum-free (for HUVEC) media, and incubated with test compounds at 4-10% overnight (16-24 h). Cell viability was then measured using CellTiter-Glo Luminescent Cell Viability Assay (Promega) according to kit instructions, with luminescence read out on a SpectraMax M5 plate reader at 500 ms integration time. Roche's Cytotoxicity Detection Kit (LDH) was used according to kit instructions.

Human neutrophils were extracted from whole blood using the EasySep Direct Human Neutrophil Isolation Kit (STEMCELL Technologies), resuspended in RPMI 1640 with 10% FBS, 2 mM Glutamax and Pen-Strep, and assayed a few hours after seeding. Human PBMCs were purchased from STEMCELL Technologies. PBMCs were incubated with compounds and the resulting supernatants submitted for Luminex cytokine analysis using the Bio-Rad 23-plus cytokine panel. Values below the detection range were set as zero. Phase contrast imaging for select cytotoxicity assays was done at 10X magnification on an Incucyte S3 (Sartorius).

For YO-PRO toxicity studies, cells were incubated at the same conditions as for CellTiter-Glo assays but with YO-PRO-1 dye (Invitrogen Y3603) at 1  $\mu$ M, imaged every 20-30 min at 20X on an Incucyte S3 in phase contrast and green fluorescence channels (300 ms exposure, 441–481 nm excitation, 503–544 nm emission).

#### *Neuron-activation assays and DRG isolation*

Neuro-2a cells were incubated in DMEM with 0.25% FBS (as used in toxicity assays) with YO-PRO-1 dye and test compounds added, and imaged every 5 min on an Incucyte S3 in phase contrast and green fluorescence channels (300 ms exposure, 441–481 nm excitation, 503–544 nm emission). YO-PRO uptake was estimated as the area of positive green fluorescence divided by total area of cells segmented in the phase contrast channel using the Incucyte analysis software– note that this underrepresents the fraction of fluorescent cells due to differences in tracked phase area and fluorescence-positive area.

Mouse DRGs were isolated from mice and processed as previously described<sup>28</sup>. Briefly, wild-type mice were euthanized by CO<sub>2</sub> inhalation, and DRGs were quickly excised into cold Hanks' Balanced Salt Solution (HBSS, Gibco) and dural sheaths were removed. The DRGs were then placed in divalent-free HBSS and enzymatically digested using a combination of collagenase and trypsin with gentle shaking. After several spins and washes, DRGs were placed in DMEM containing 10% inactivated horse serum, and dissociated by gentle trituration using 1 mL and 200 mL pipet tips. The dissociated cell suspensions were purified by myelin



elimination using magnetic anti-myelin beads. The purified cells were counted and suspended in HibernateA containing 10% inactivated horse serum. The cells were plated on 96 well PDL-coated plates (BD) and incubated overnight at 37°C for YO-PRO influx measurements, and on Poly-D-Lysine-coated glass coverslips placed in a multiwell culture dish for Calcium influx measurements. Plated cells were then flooded with complete cell medium consisting of DMEM, 10% heat-inactivated horse serum, 2 mM L-glutamine, 0.8% D-glucose, 100 units penicillin, and 100 mg/ml streptomycin. YO-PRO uptake and calcium-influx measurements were performed within 24 hours of cell isolation.

Mouse DRGs were incubated in DMEM with 10% FBS and preincubated with YO-PRO-1 dye for 20+ minutes before *C. perfringens* supernatant addition. Cells were then imaged every 5 minutes for 4 h in phase contrast and FITC channels with a Plan Apo 20x (NA 0.75, Nikon) objective on a Nikon TI-E perfect focus inverted microscope equipped with a Neo sCMOS camera (Andor, Oxford Instruments), 37°C/5% CO<sub>2</sub> environmental chamber (Okolab), and a SOLA V-NIR LED lightsource (Lumencor), all run by NIS Elements software (Nikon). For purified toxin experiments, cells were imaged every 3 min for 2.5 h in phase contrast and 488 nm laser channels with a similar Nikon microscope setup equipped with a spinning disk confocal CSU-X1 (Andor, Oxford Instruments), ILE laser launch (Spectral Applied Research), and Prime 95B sCMOS camera (Teledyne Photometrics). YO-PRO uptake was analyzed by the sum green fluorescence intensity above a set threshold, normalized to the initial area of cells segmented in phase-contrast channel in NIS Elements software.

#### *Prevalence estimate of C. perfringens*

Preprocessing and taxonomy classification were performed on metagenomic sequence reads as previously described<sup>29</sup>. Briefly, reads were de-replicated using PrinSeq v0.20.4, trimmed using trimmomatic v0.39, and aligned to PhiX and the Pacific Biosciences human genome (GenBank GCA\_000772585.1) using bowtie2 v2.4.1. Unmapped reads were subsequently classified with kraken v2.1.1 with a confidence parameter of 0.2 (“--confidence 0.2”) against a custom reference database containing 112,320 genomes from 64,468 species (61,220 bacterial, 3,248 archaeal) from the Genome Taxonomy Database (GTDB) release 207<sup>15,16</sup> and then processed with bracken v2.5 with a read threshold of 250 (“-t 250”). Prevalence of *C. perfringens* was calculated from bracken output for two independent healthy cohorts (Milieu Intérieur, Israeli), three UC cohorts, and two CD cohorts. The Milieu Intérieur cohort included 500 men and 500 women between 20 and 69 years of age from the suburban Rennes area (Ille-et-Vilaine, Bretagne, France)<sup>29</sup>. Stool aliquots were processed, DNA extracted, and shotgun

metagenomic sequencing was performed by Diversigen, Inc. as described previously<sup>29</sup>. The Israeli cohort included 1,159 samples from 851 non-diabetic donors between 20 and 69 years of age<sup>30</sup>. The CD (BERGAMOT cohorts 1, 2, 3) and UC (LAUREL, HIBISCUS I and II) cohorts were obtained from five phase 3 randomized clinical trials comparing the safety and efficacy of etrolizumab in patients from 18 to 80 years of age with moderate-to-severe active UC or CD<sup>31-33</sup>. Stool samples from BERGAMOT cohort 1 and LAUREL were processed, DNA extracted, and shotgun metagenomic sequenced by Microbiotica, Ltd. Stool samples from BERGAMOT 2 and 3 and HIBISCUS I and II were processed, DNA extracted, and shotgun metagenomic sequenced by CosmosID.

DNA was extracted from biopsy tissue from LAUREL, HICKORY, and BERGAMOT cohort 1 using the AllPrep DNA/RNA Kit (Qiagen) with bead beating. 16S sequencing of the V3\_V4 region was performed by Microbiotica, Ltd. using the primers 357F and 800R. 16S sequences were quality trimmed, denoised, dereplicated, and filtered for chimeras using QIIME2 v2019.7. Taxonomy was assigned using a custom database of 16S rRNA sequences from GTDB release 207 and prevalence of *C. perfringens* was calculated from species-level count tables.

Using the curatedMetagenomicData R package (v3.9.1)<sup>34</sup>, *C. perfringens* relative abundances, as determined by MetaPhlan3, and sample metadata were retrieved for 21,030 stool samples with the command “returnSamples”. Of those, the 13,827 stool samples with disease equal to “healthy” or study\_condition equal to “control” were selected, along with 2,054 samples with disease equal to “IBD”, from 77 studies (**Supplementary Table 6**). Some subjects were sampled more than once: relative abundance values for *C. perfringens* were averaged per-subject where indicated.

## SUPPLEMENTARY FIGURES

## A Biopsy sample, pre-culturing

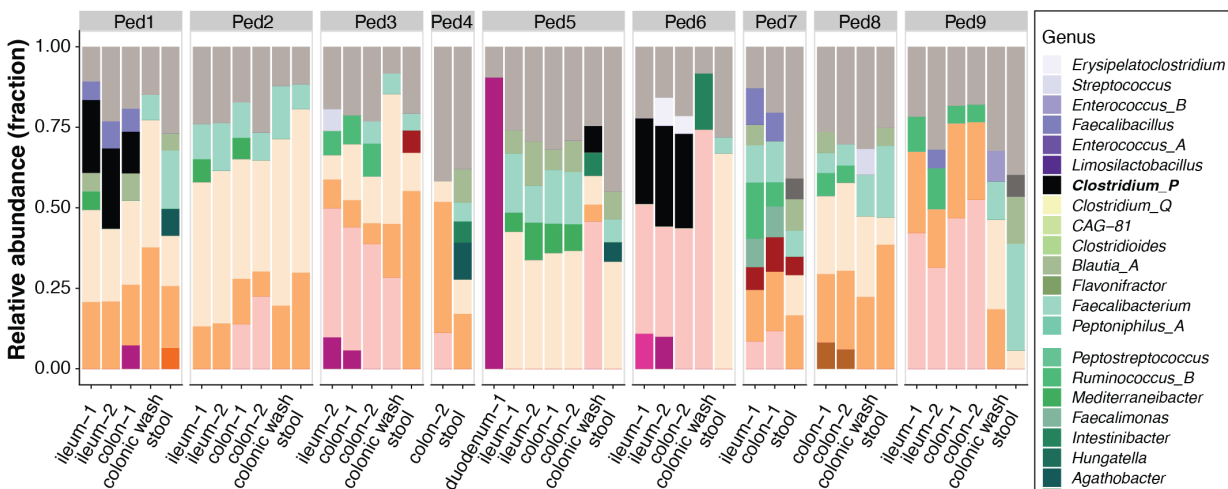

## B BHI outgrowth

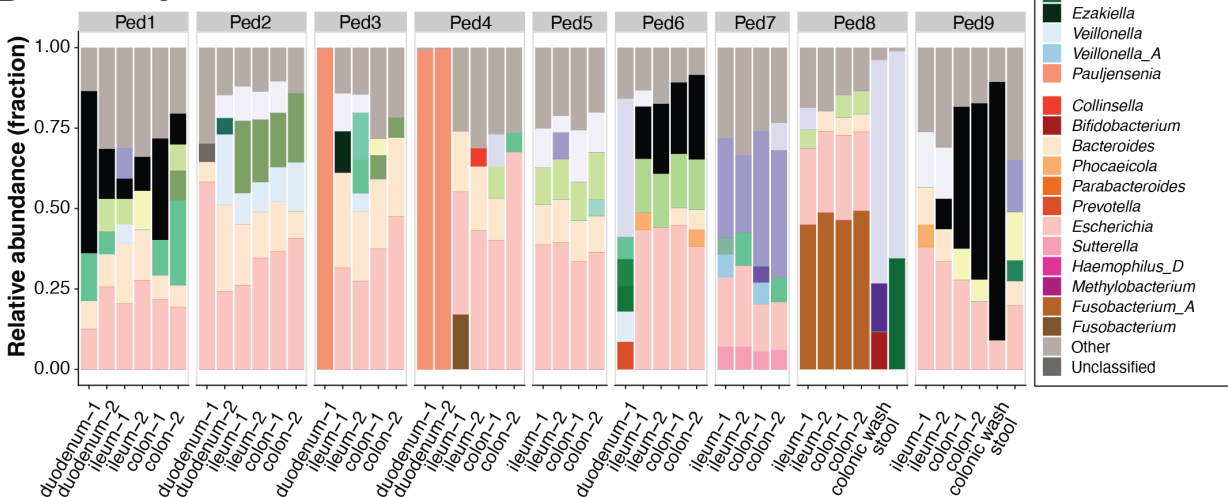

**Supplementary Figure 1. Variation in microbiota composition of colonic biopsy outgrowth across different growth media.** Patient samples sequenced (A) directly as biopsies pre-culturing and (B) after the second passage outgrowth in BHI media. Samples were sequenced using 16S V4 sequencing and classified at the genus taxonomic rank. *Clostridium\_P* (black, bold) is *Clostridium perfringens*. Minimum 10,000 reads filtering cutoff per sample.

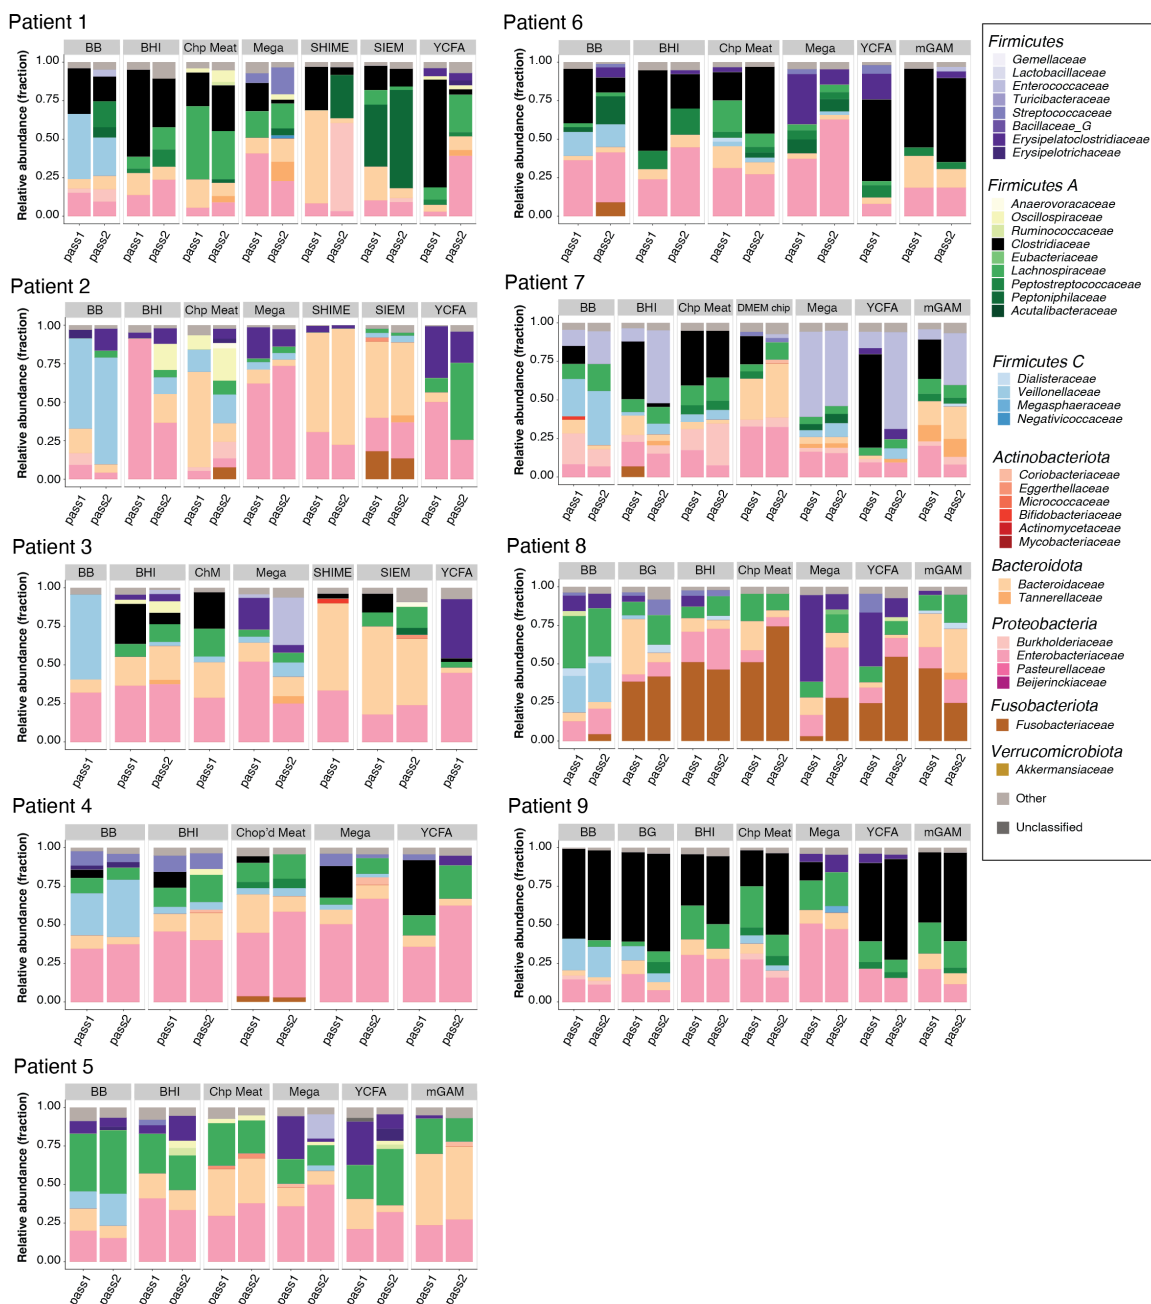

**Supplementary Figure 2. Variation in microbiota composition of colonic biopsy outgrowth across different growth media.** The microbiota outgrowth of one colonic biopsy from each patient grown in different media was sequenced using 16S V4 rRNA and classified at family taxonomic rank. Filtering cutoff per sample: minimum 10,000 reads. Both passages shown. BB, Bryant and Burkey; BHI, brain heart infusion; Chp Meat/ChM/Chp'd Meat, chopped meat; SHIME, simulator of the human intestinal microbial ecosystem; SIEM, simulated intestinal efflux media; YCFA, yeast casitone fatty acids (modified); mGAM, modified Gifu Anaerobic Medium; BG, BB + mGAM combo.

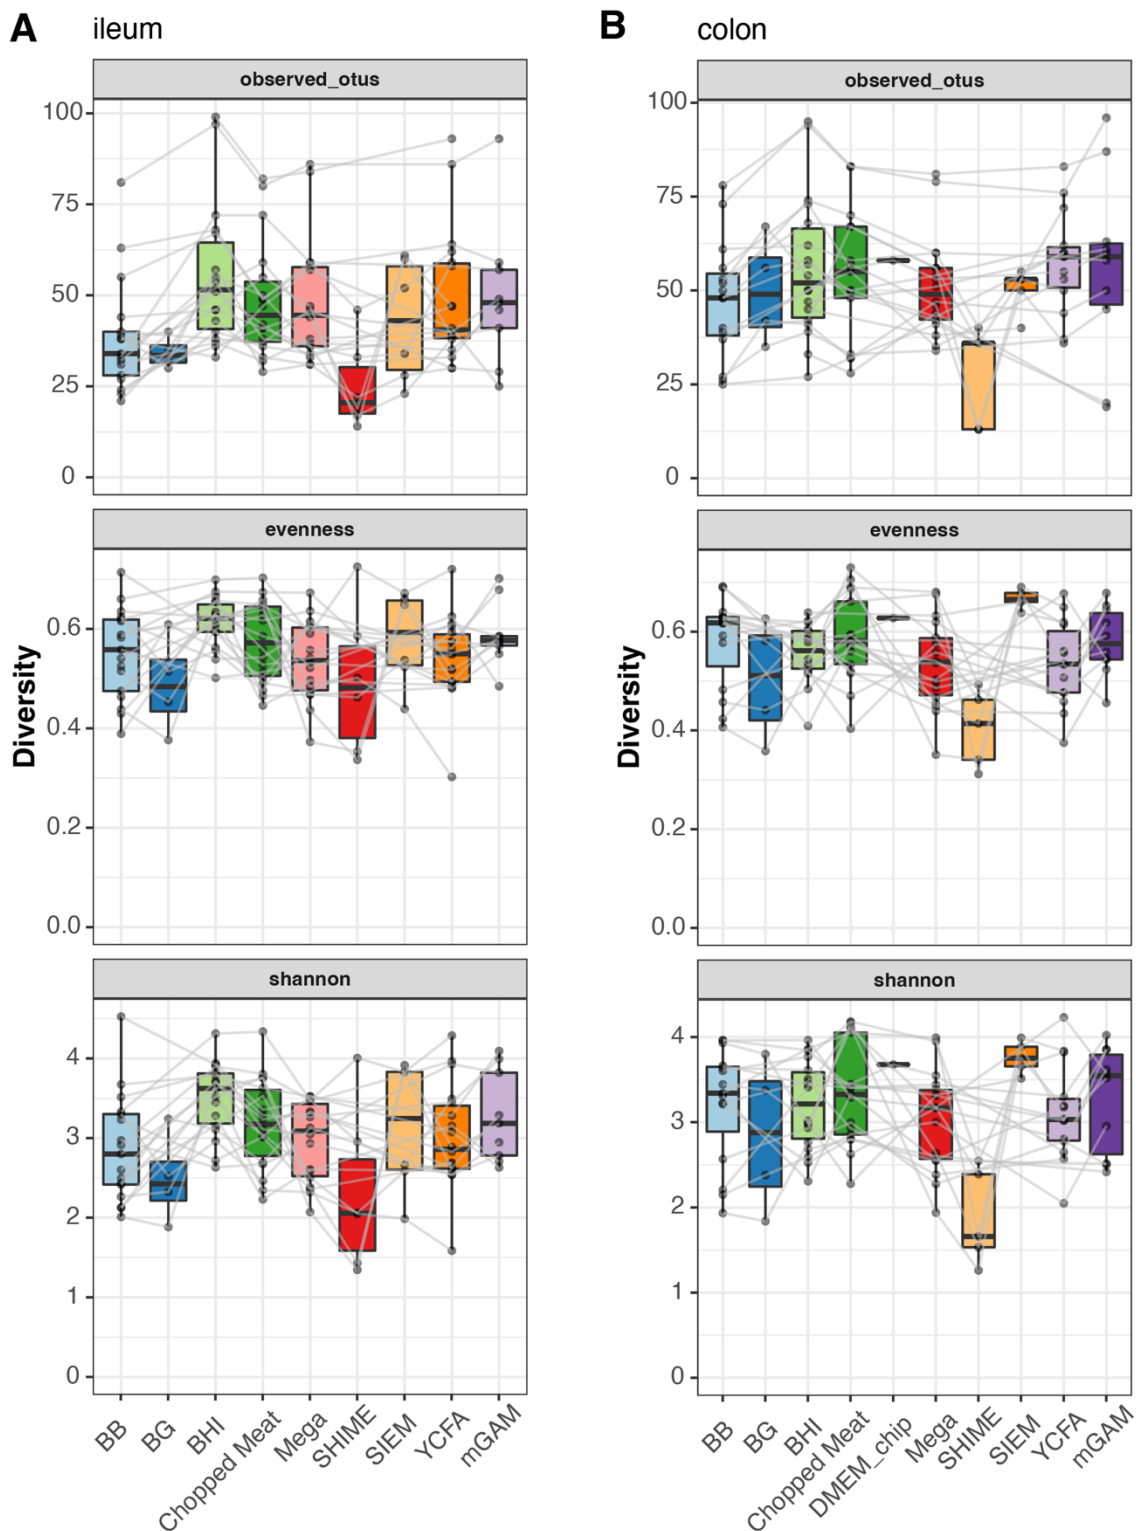

**Supplementary Figure 3.  $\alpha$ -diversity of microbial communities grown from ileal and colonic biopsies in various media.** 16S V4 sequence data from (A) ileal and (B) colonic biopsy outgrowth in different growth media from the second passage for each patient. Top panel: Total number of observed OTUs (richness). Middle panel: Community evenness. Bottom panel: Shannon diversity index.

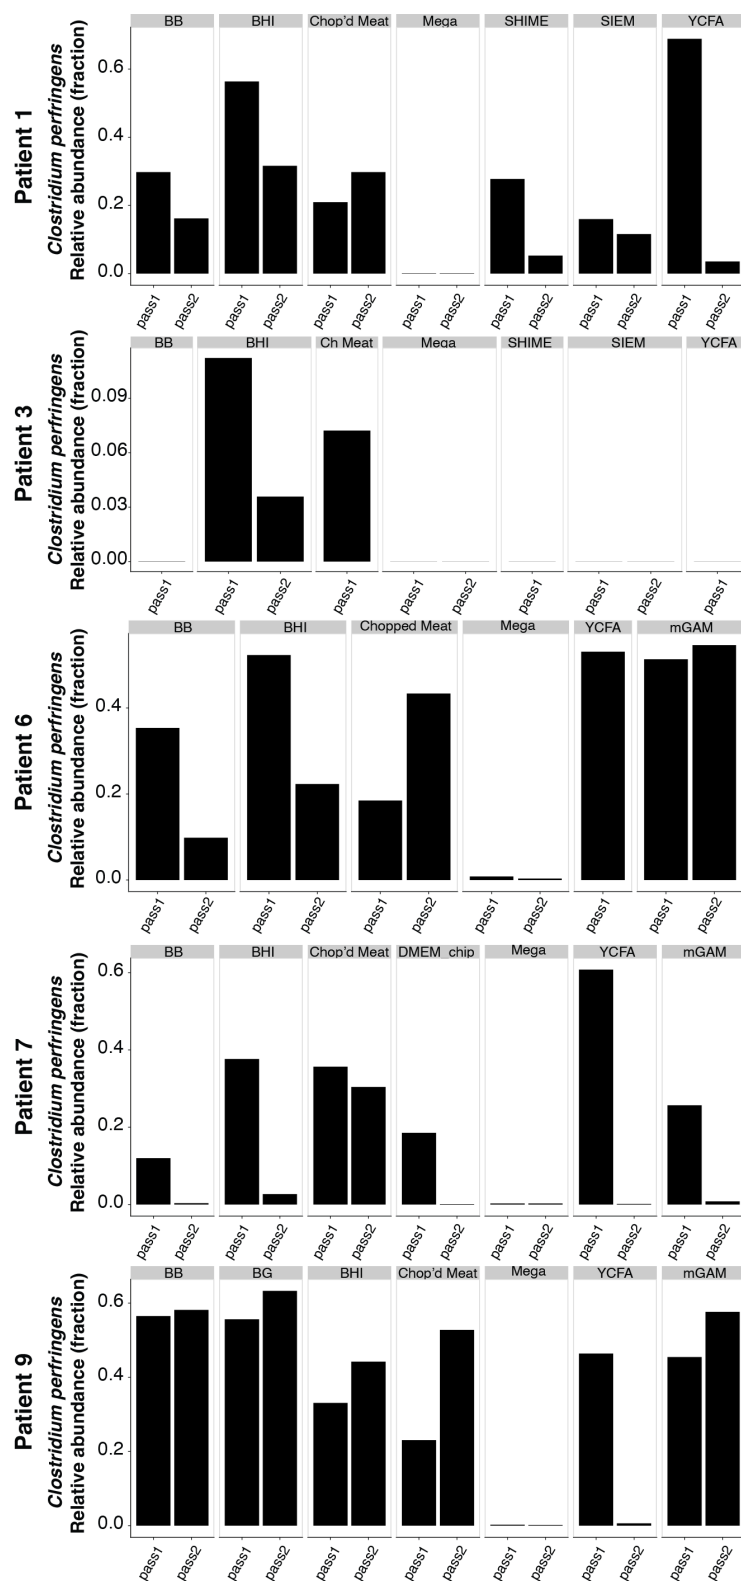

**Supplementary Figure 4. Impact of growth media and passage number on the outgrowth of *C. perfringens* from patient biopsies.** 16S V4 sequencing is sufficient to classify *C. perfringens* to the species level. *C. perfringens* abundance from the colonic biopsy outgrowth in different growth conditions is shown for each patient where *C. perfringens* was detected after outgrowth. Both passages are shown.

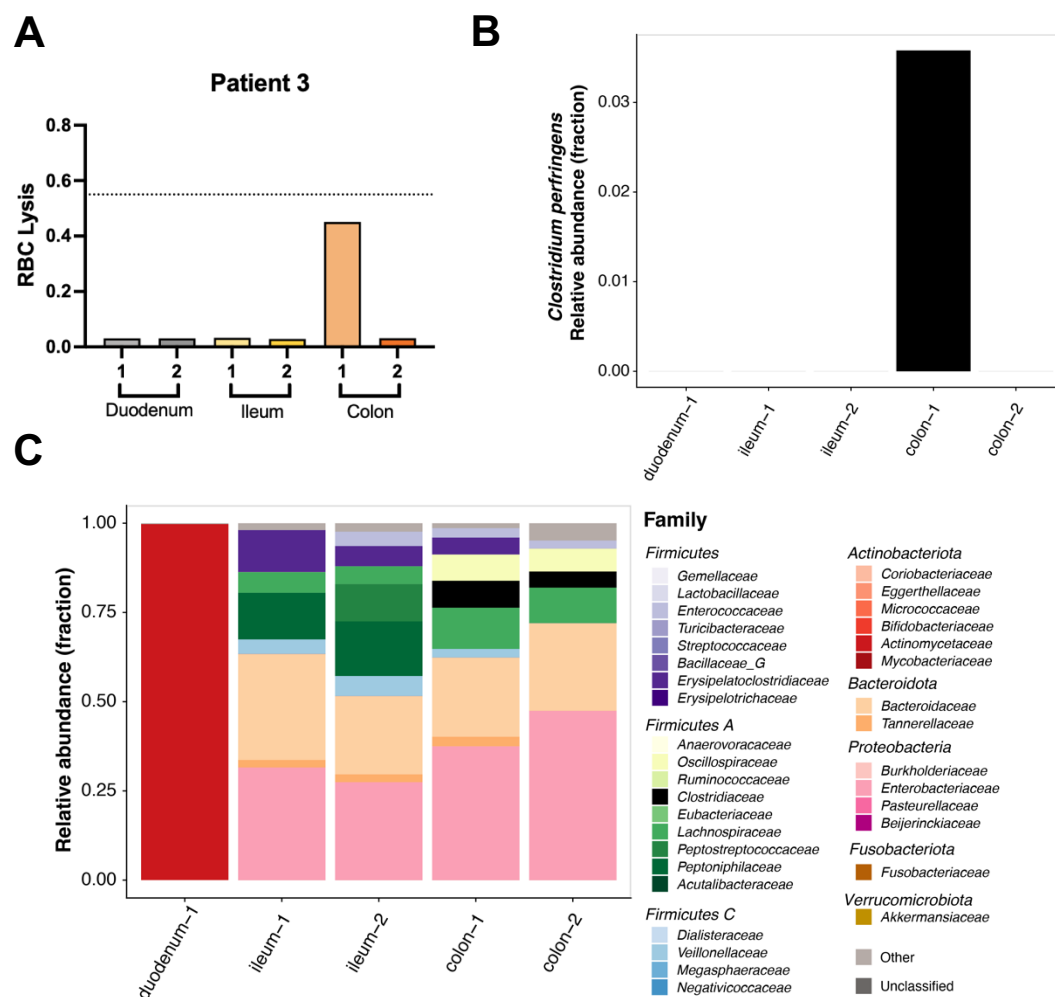

**Supplementary Figure 5. Correlation between hemolytic activity and *C. perfringens* presence in a colonic biopsy from Patient 3.** (A) RBC lysis measured after 4 hour incubation with 10% bacterial supernatants from the BHI outgrowth after two passages of Patient 3 biopsies. RBC lysis was measured as  $(OD_{450} - OD_{650})$ . Dotted lines represent lysis with 0.5% Triton X-100 as the 100% lysis control. 16S V4 sequencing from the matched BHI outgrown communities were performed: (B) *C. perfringens* community abundance and (C) family taxonomic rank are shown (note that *Clostridiaceae* also includes other species besides *C. perfringens*).

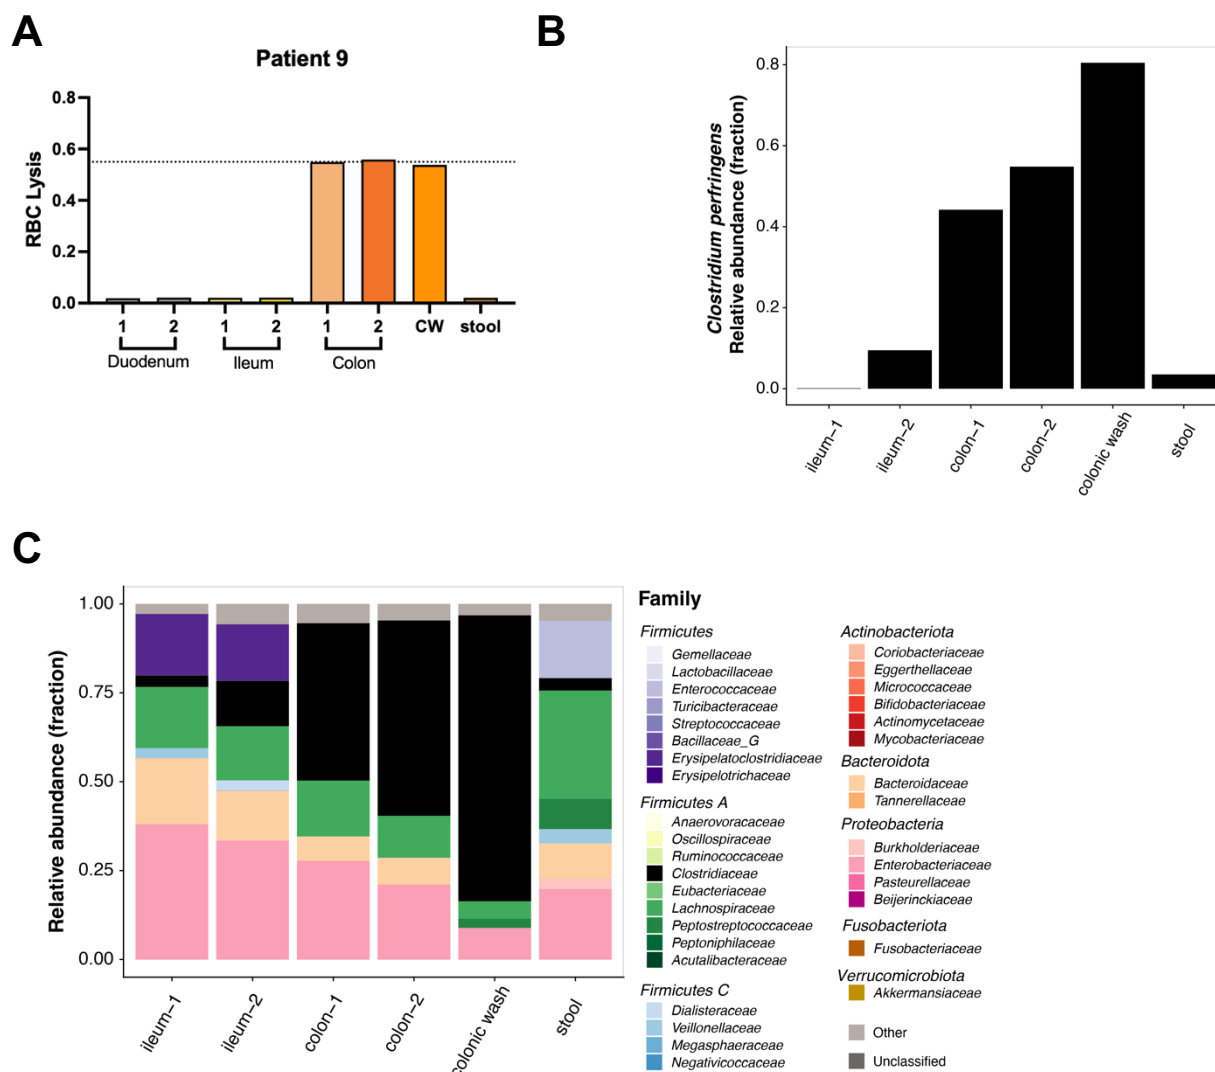

**Supplementary Figure 6. Elevated hemolytic activity in biopsy outgrowth compared to stool from Patient 9.** (A) RBC lysis measured after 4 hour incubation with 10% bacterial supernatants from the BHI outgrowth supernatants after two passages of Patient 9 biopsies, colonic wash (CW), and stool samples. Dotted lines indicate lysis with 0.5% Triton X-100 as the 100% lysis control. Two biopsies from each location were evaluated for activity. RBC lysis was measured as  $(OD_{450} - OD_{650})$ . 16S V4 sequence from the matched BHI community was performed: (B) *C. perfringens* community abundance and (C) family taxonomic rank are shown (note that *Clostridiaceae* also includes other species besides *C. perfringens*).



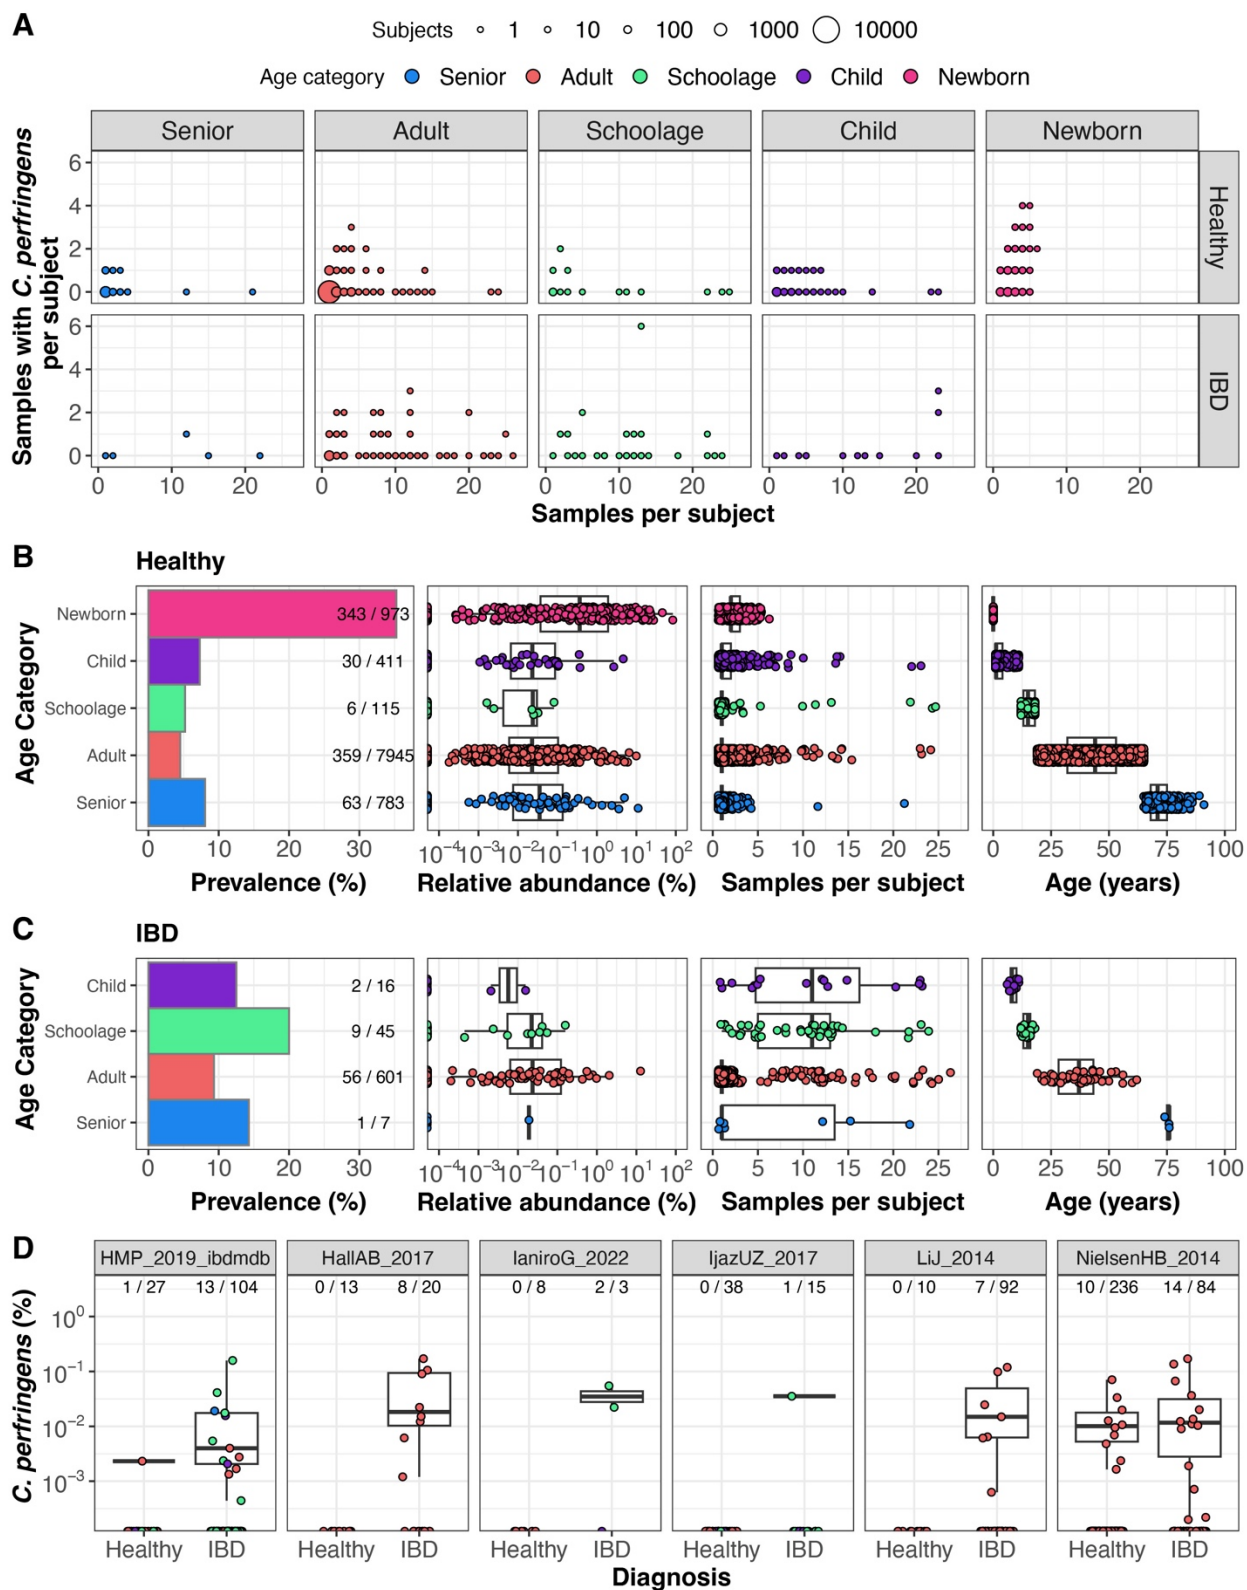

**Supplementary Figure 7. *C. perfringens* abundance and prevalence in healthy subjects.** Publicly available curated metagenomic datasets (77 total) were analyzed for *C. perfringens* abundance and prevalence in “healthy” or “control” subjects and IBD subjects. Subjects were grouped by age (newborn:

<1 year old, child: 1-11 y, schoolage: 12-18 y, adult: 19-65 y, senior: 65+ y). An exact age was not provided for some subjects, only age category. For a list of compiled studies, see **Supplementary Table 6**. (A) Multiple samples were collected from some subjects, without a clear correlation of more sampling leading to more *C. perfringens* detected. (B,C) *C. perfringens* prevalence, average relative abundance, number of samples collected per subject, and subject age for (B) “healthy” and “control” subjects or (C) IBD subjects. Prevalence is calculated based on detection of *C. perfringens* in any sample from a given subject. Relative abundance is the average across all samples from a subject. (D) Direct comparison of *C. perfringens* relative abundance in healthy/control vs. IBD subjects from studies with both healthy/control and IBD groups. Fraction of total samples with *C. perfringens* detected shown along the top.

(Note that different extraction methods were used for datasets, with many protocols not including bead-beating. It is also worth noting that different computational methods vary in species detection ability, where Kraken/bracken (used to analyze MI, Zeevi, etrolizumab WMS data featured in Figure 3G) is much more sensitive and less specific than MetaPhlan3 (used for curatedMetagenomicData).)

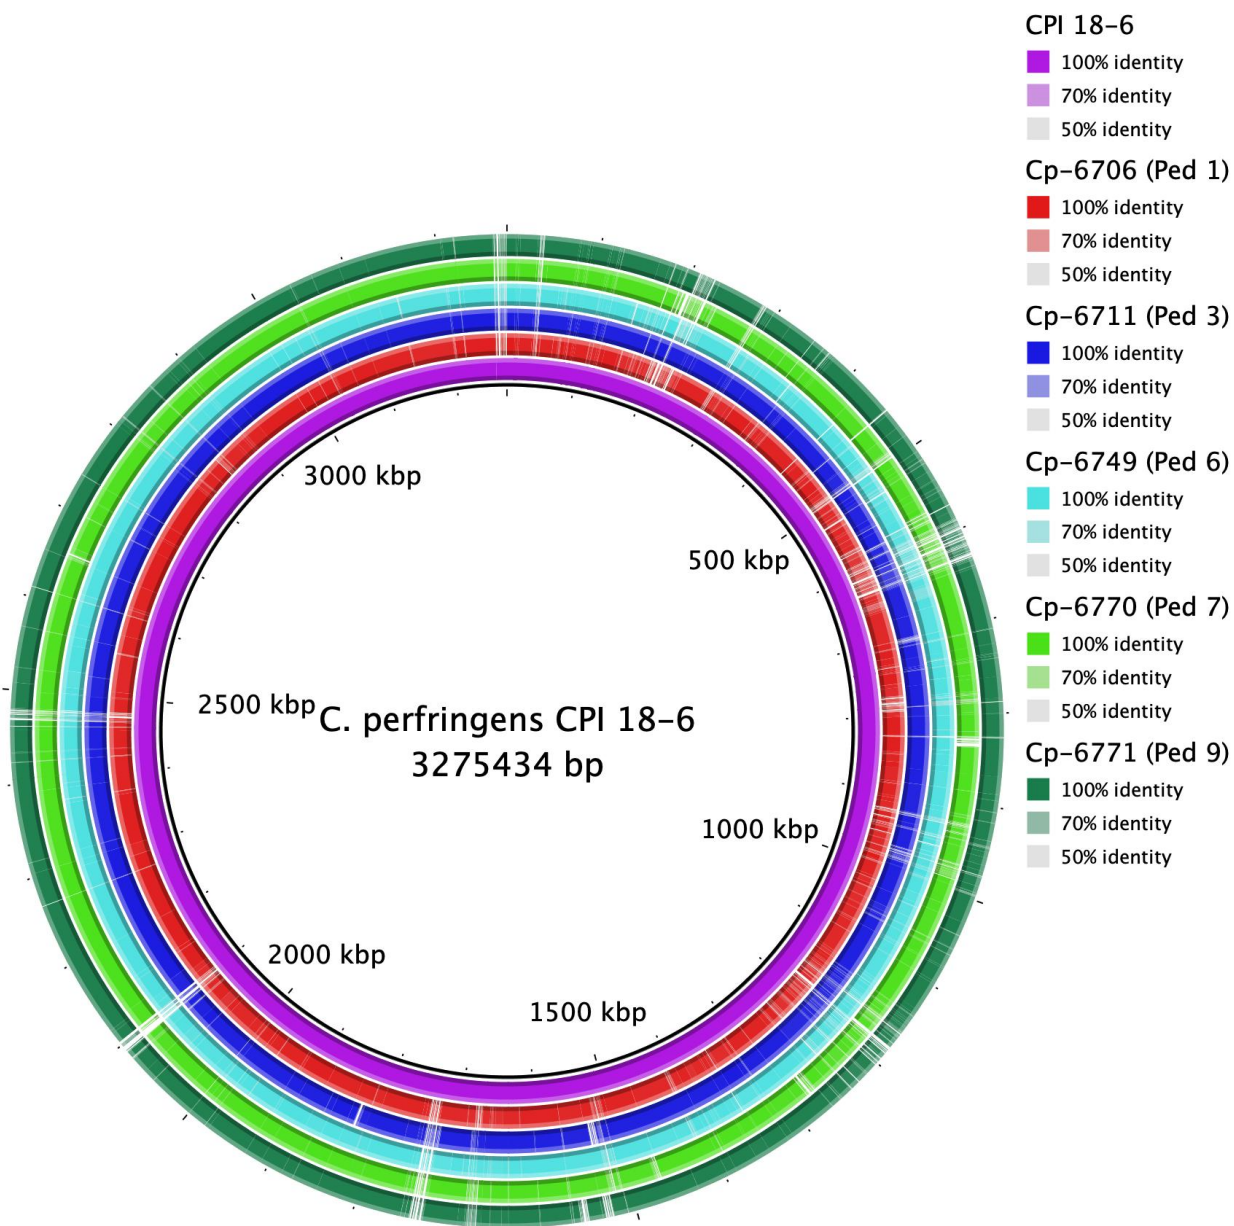

**Supplementary Figure 8. Distinct genome content of the five *C. perfringens* isolates.** Shown is a genome-wide BLAST comparison of *C. perfringens* genome sequences. Rings show high-scoring segment pairs (HSPs) yielded by BLASTn searches of the corresponding query *C. perfringens* genomes against reference genome *C. perfringens* CPI 18-6 with default BLAST parameter settings. This figure was produced using BRIG<sup>22</sup>.

## Clade I. (Patient 9)

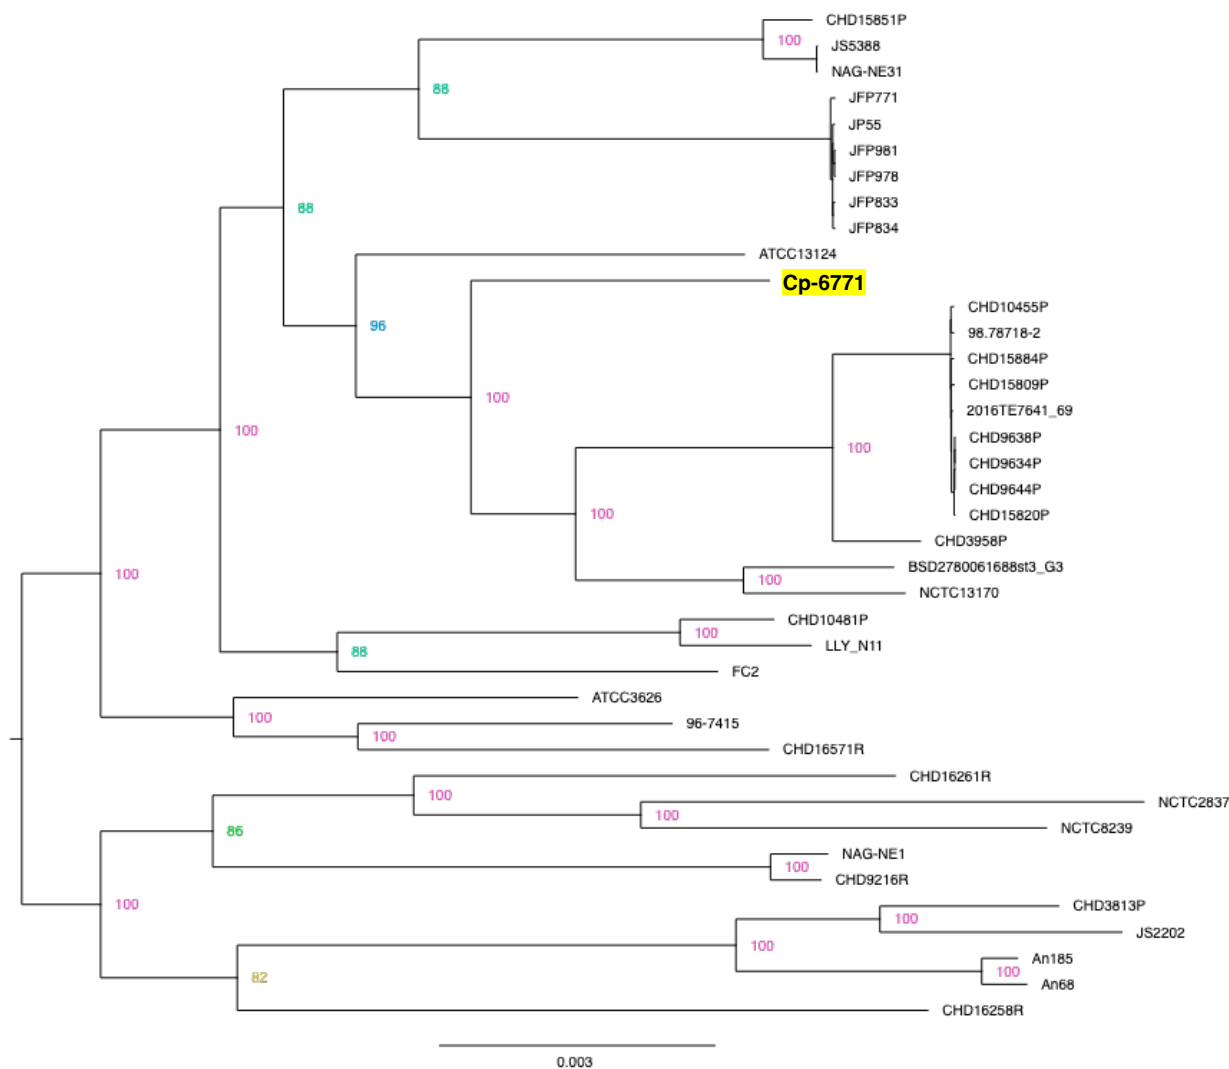

**Supplementary Figure 9.1. Maximum likelihood phylogeny based on an alignment of *C. perfringens* core genes – Cp-6771.** Bootstrap values are shown. Public genomes were selected for inclusion based on a prior publication<sup>35</sup> and *C. perfringens* isolates from the current study are highlighted.

## Clade II. (Patients 3 and 7)

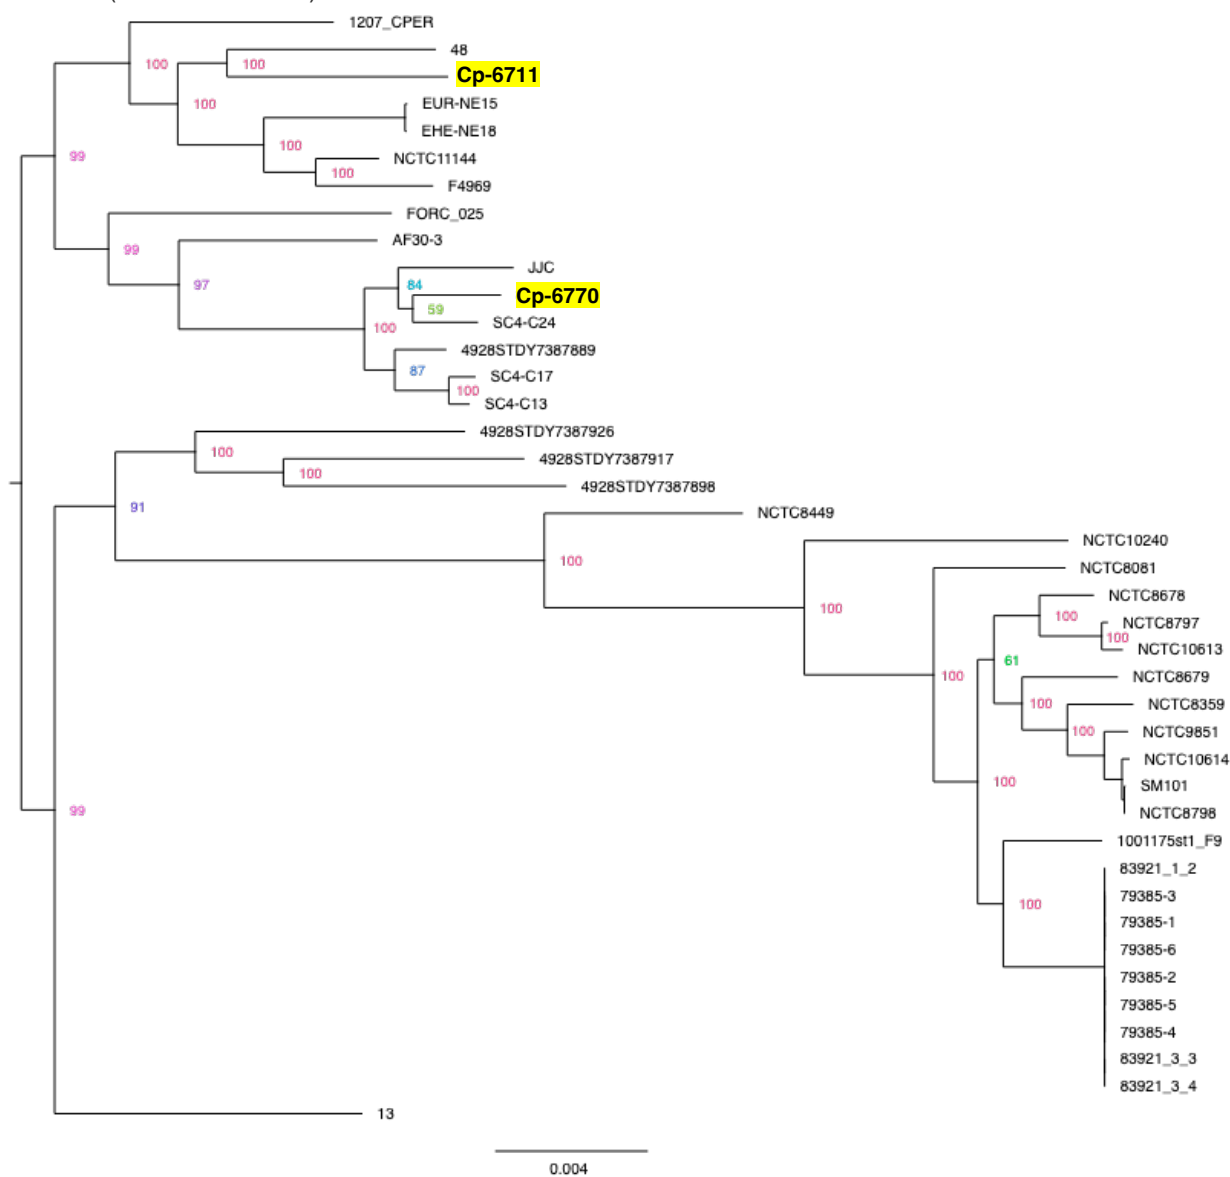

**Supplementary Figure 9.2. Maximum likelihood phylogeny based on an alignment of *C. perfringens* core genes – Cp-6711 and Cp-6770.** Bootstrap values are shown. Public genomes were selected for inclusion based on a prior publication<sup>35</sup> and *C. perfringens* isolates from the current study are highlighted.

## Clade V. (Patients 1 and 6)

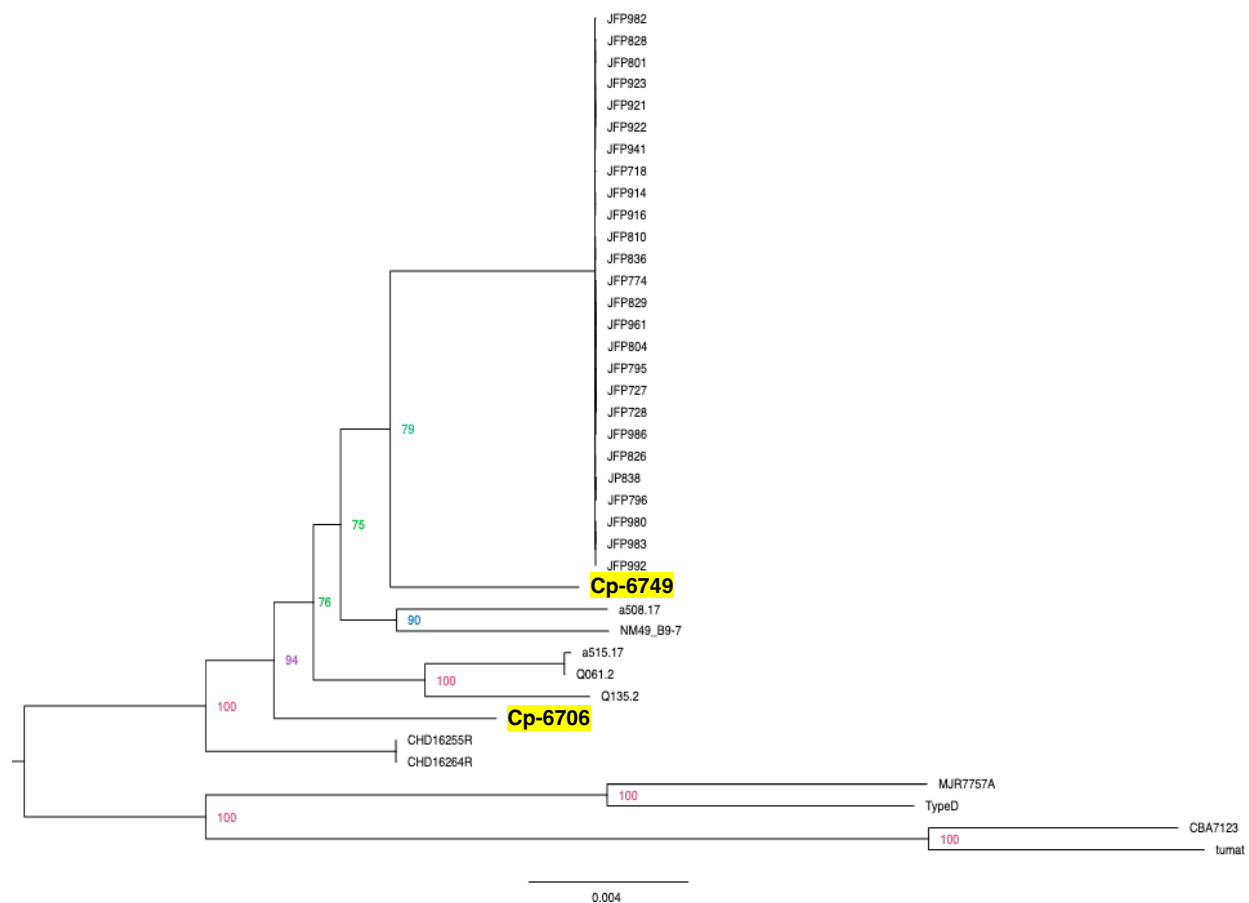

**Supplementary Figure 9.3. Maximum likelihood phylogeny based on an alignment of *C. perfringens* core genes – Cp-6706 and Cp-6749.** Bootstrap values are shown. Public genomes were selected for inclusion based on a prior publication<sup>35</sup> and *C. perfringens* isolates from the current study are highlighted.

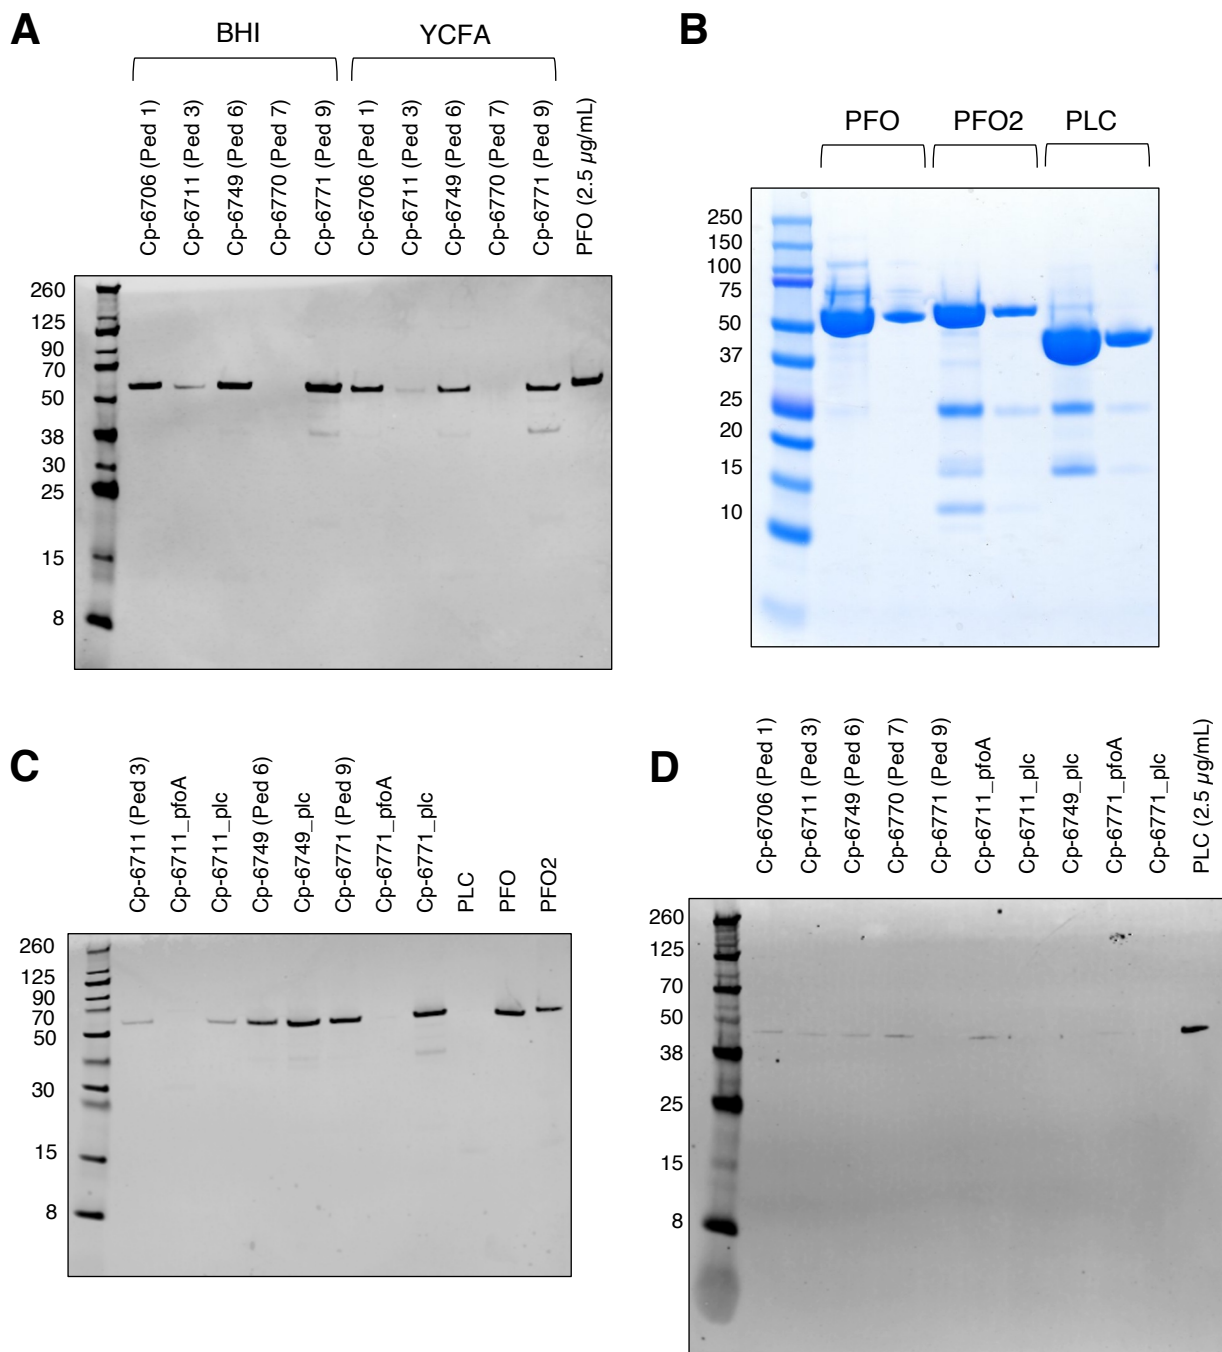

**Supplementary Figure 10. Protein analysis of *C. perfringens* supernatants and purified hemolytic toxins.** (A) Full Western blot of *C. perfringens* supernatants grown in BHI and YCFA probed for PFO protein levels, compared with commercial PFO protein (ATCC) at 2.5  $\mu$ g/mL. Selected section shown in Figure 4B. (B) SDS-PAGE analysis of *E. coli* expressed and purified hemolytic toxins from *C. perfringens*: PFO1, perfringolysin O; PFO2, alveolysin; PLC, alpha-toxin. 10  $\mu$ l (first lane) and 1  $\mu$ l (second lane) of the eluted fraction were loaded. (C) Full Western blot of *C. perfringens* toxin mutant supernatants grown in BHI and purified toxins, probed for PFO protein levels. Selected section shown in Figure 4G. (D) Western blot of *C. perfringens* supernatants grown in BHI, probed for PLC protein.

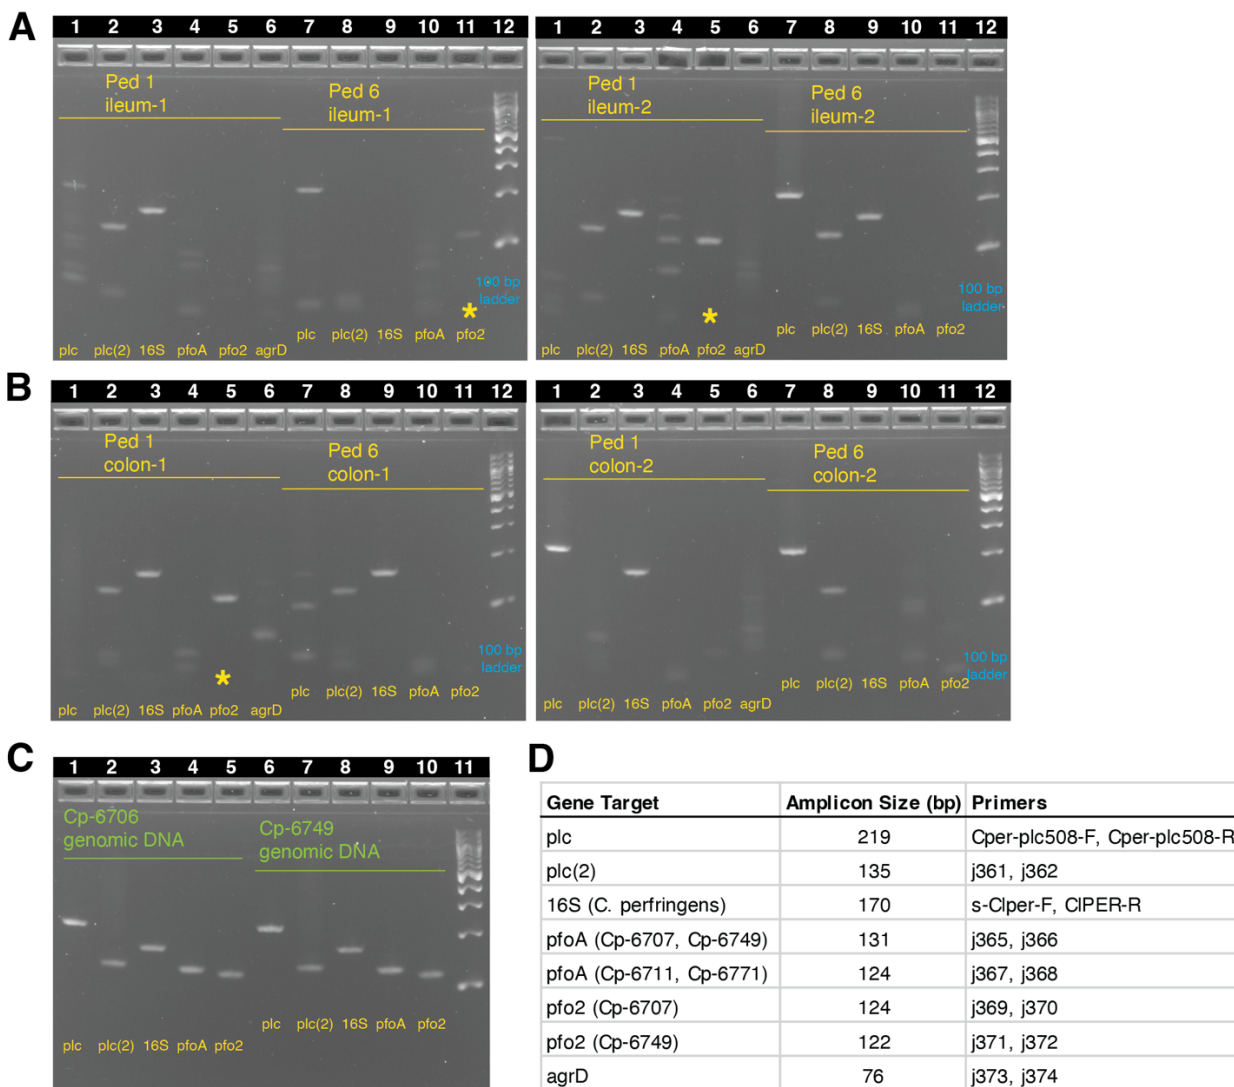

**Supplementary Figure 11. Biopsy cDNA PCR for *C. perfringens* genes.** (A-D) PCR of biopsy cDNA using qPCR-design primers for signatures of indicated genes. RNA was extracted from biopsies, DNase-treated with two methods, and cDNA was prepared by reverse transcription. Annotated *plc* and *plc(2)* indicate different primer sets for the *plc* gene; *agrD* is a quorum sensing autoinducer peptide gene<sup>36</sup>. (E) PCR of genomic DNA with corresponding primers. Primers were also confirmed on cDNA from extracted RNA of pure isolate *C. perfringens* cultures grown in BHI. (F) Amplicon sizes for each gene targeted and primers used. The *plc* and 16S primer sets are those used in a different study<sup>37</sup>.



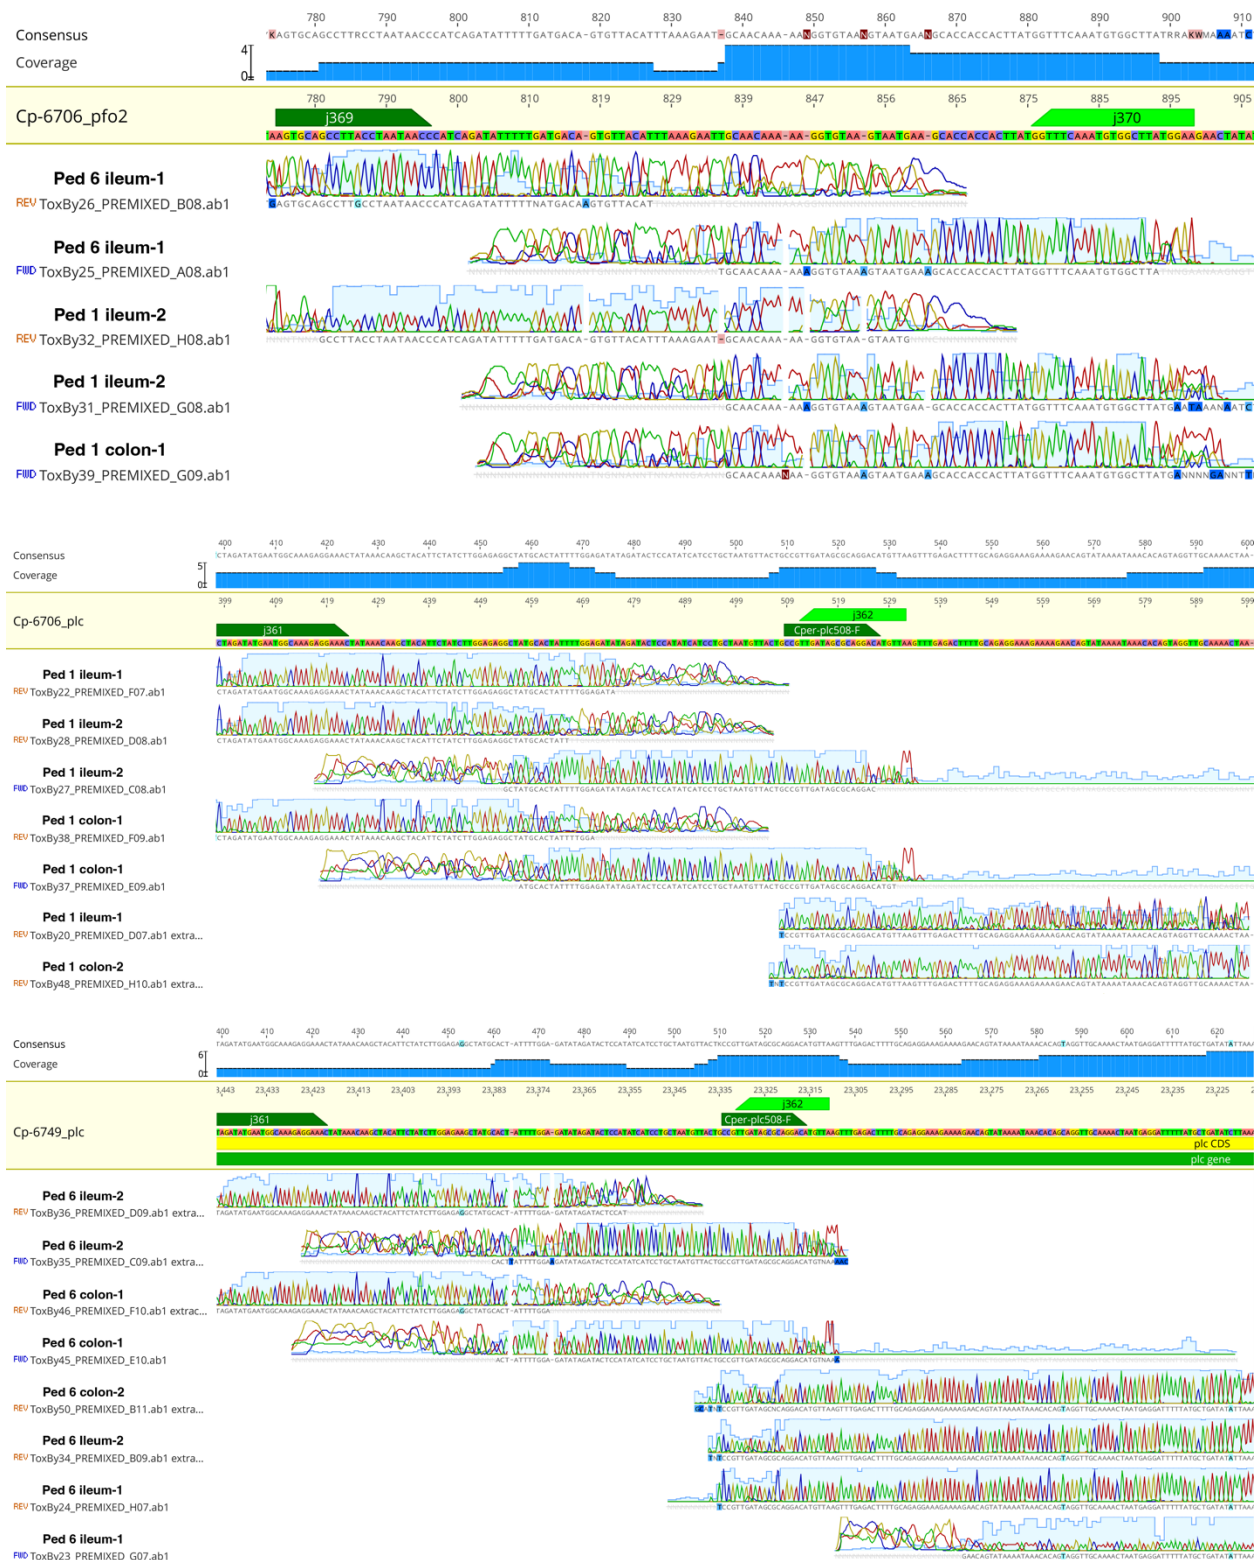

**Supplementary Figure 12. Biopsy cDNA PCR Sanger sequencing results.** Sequencing of (A) *pfo2* and (B) *plc* amplicons from biopsy cDNA PCR. Corresponding bands seen in **Supplementary Figure 11**. Alignment of select sequences using Geneious version 2023.2 created by Biomatters.

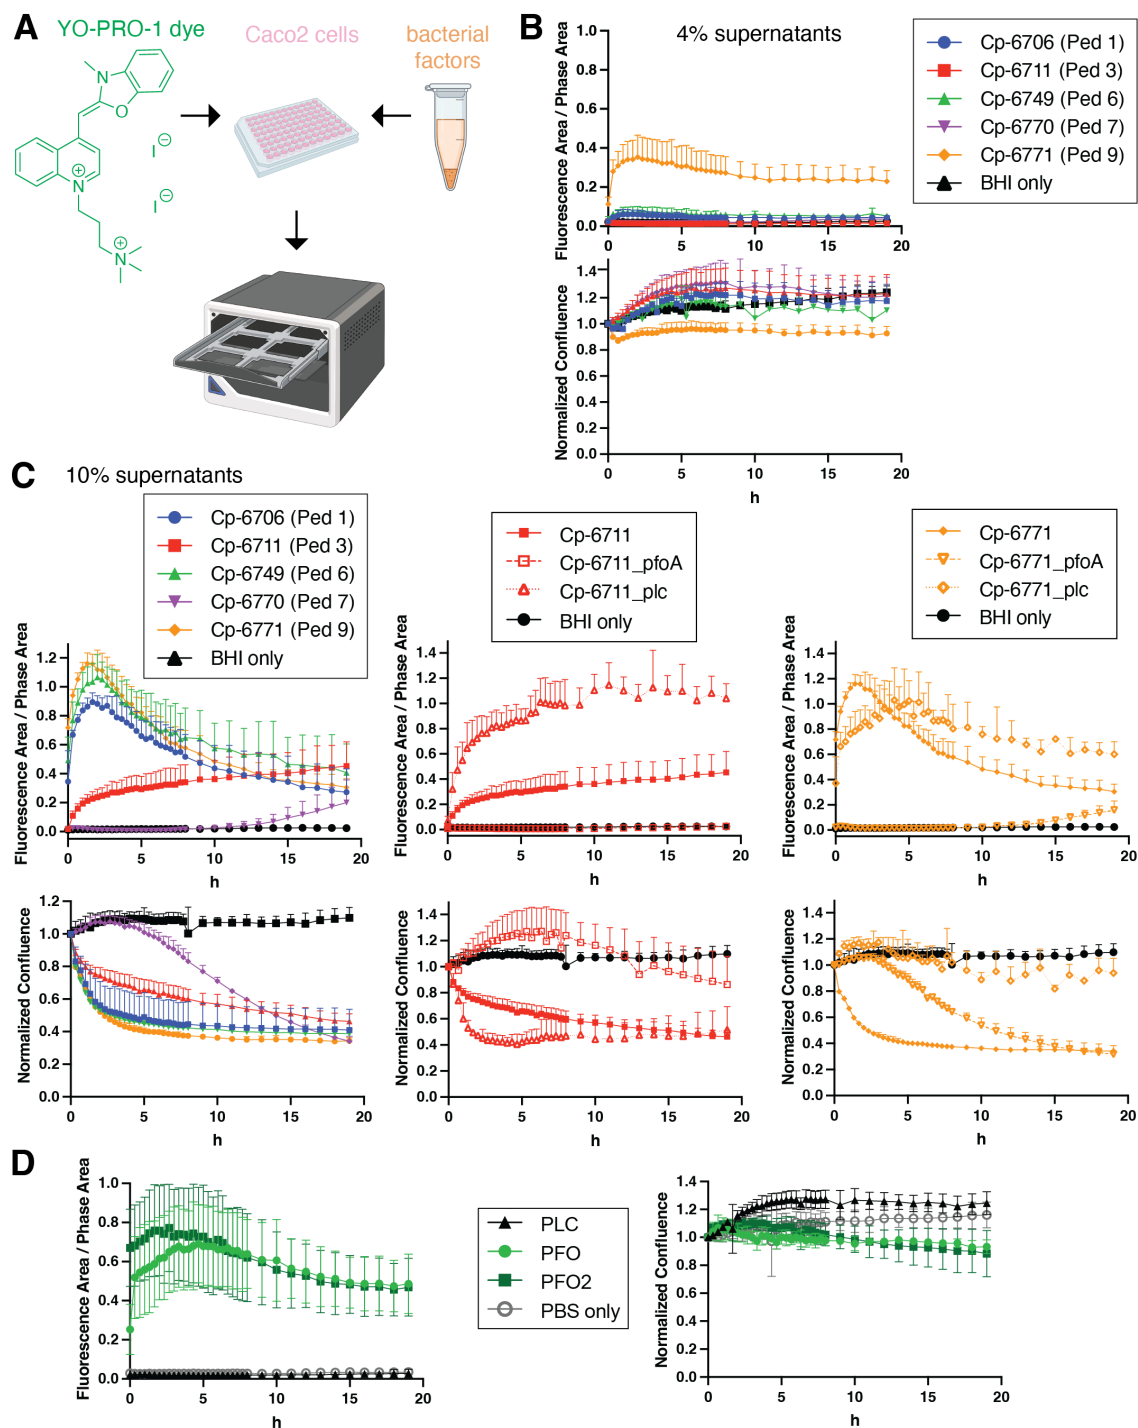

**Supplementary Figure 13. Caco2 epithelial permeability is induced by *C. perfringens*. (A)**

Experimental setup schematic: Caco2 epithelial cells were incubated with apoptotic cell permeable fluorescent dye YO-PRO and bacterial supernatants or proteins for live imaging in an Incucyte S3, monitoring YO-PRO uptake. Individual *C. perfringens* strains were grown overnight in BHI media, and final concentrations of (B) 4% or (C) 10% bacterial supernatants were added to the Caco2 cells with YO-PRO, measuring fluorescence area as a fraction of phase contrast area, and confluence normalized to the starting confluence per field of view. (C) Measurements were on unmodified parent strains, Cp-6711 insertion mutants, and Cp-6771 insertion mutants. (D) Purified toxins were added at 800 ng/mL. Three (B-C) or four (D) biological replicate wells and two image locations within each well.

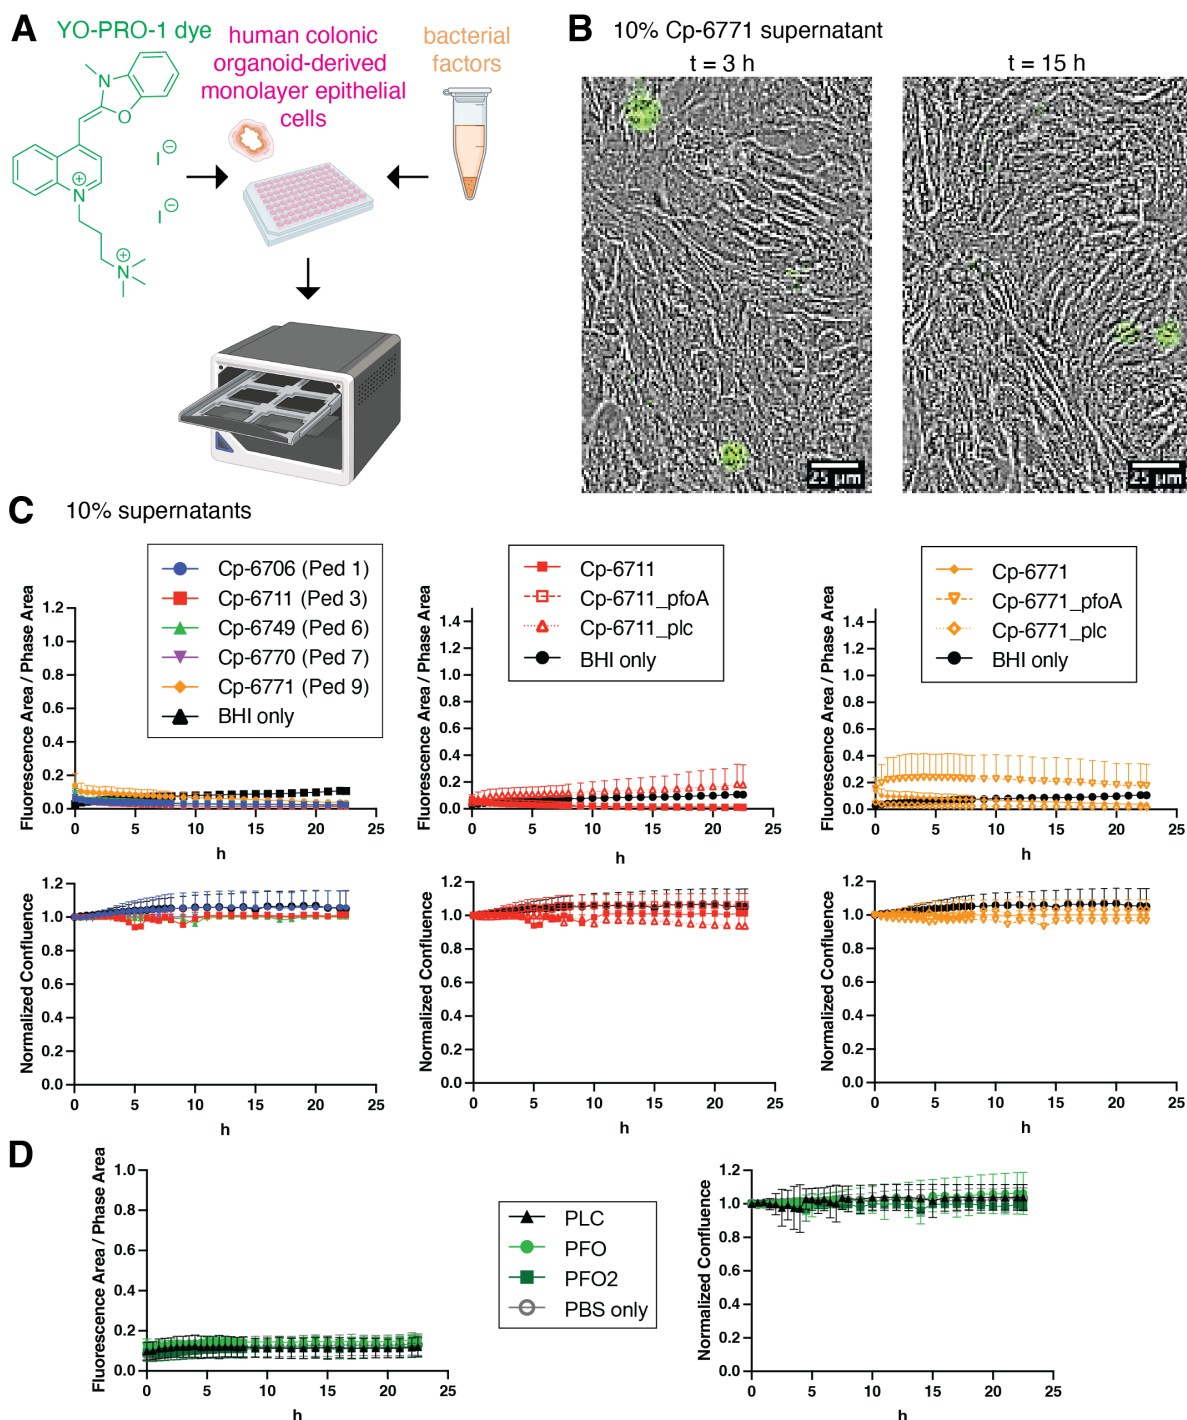

**Supplementary Figure 14. Human colonic organoid-derived monolayer epithelial cells mostly resistant to *C. perfringens*.** (A) Experimental setup: colonic organoid-derived monolayer epithelial cells were incubated with apoptotic cell permeable fluorescent dye YO-PRO and bacterial supernatants or proteins for live imaging in an Incucyte S3, monitoring YO-PRO uptake. Individual *C. perfringens* strains were grown overnight in BHI media, and final concentrations of 10% bacterial supernatants were added with YO-PRO, measuring fluorescence area as a fraction of phase contrast area, and confluence normalized to the starting confluence per field of view. (B) Phase contrast images with green fluorescence show monolayer of cells remains intact throughout. (C) Measurements were with unmodified parent strains, Cp-6711 insertion mutants, and Cp-6771 insertion mutants. (D) Purified toxins were added at 800 ng/mL. Three (B-C) or four (D) biological replicate wells and two image locations within each well.

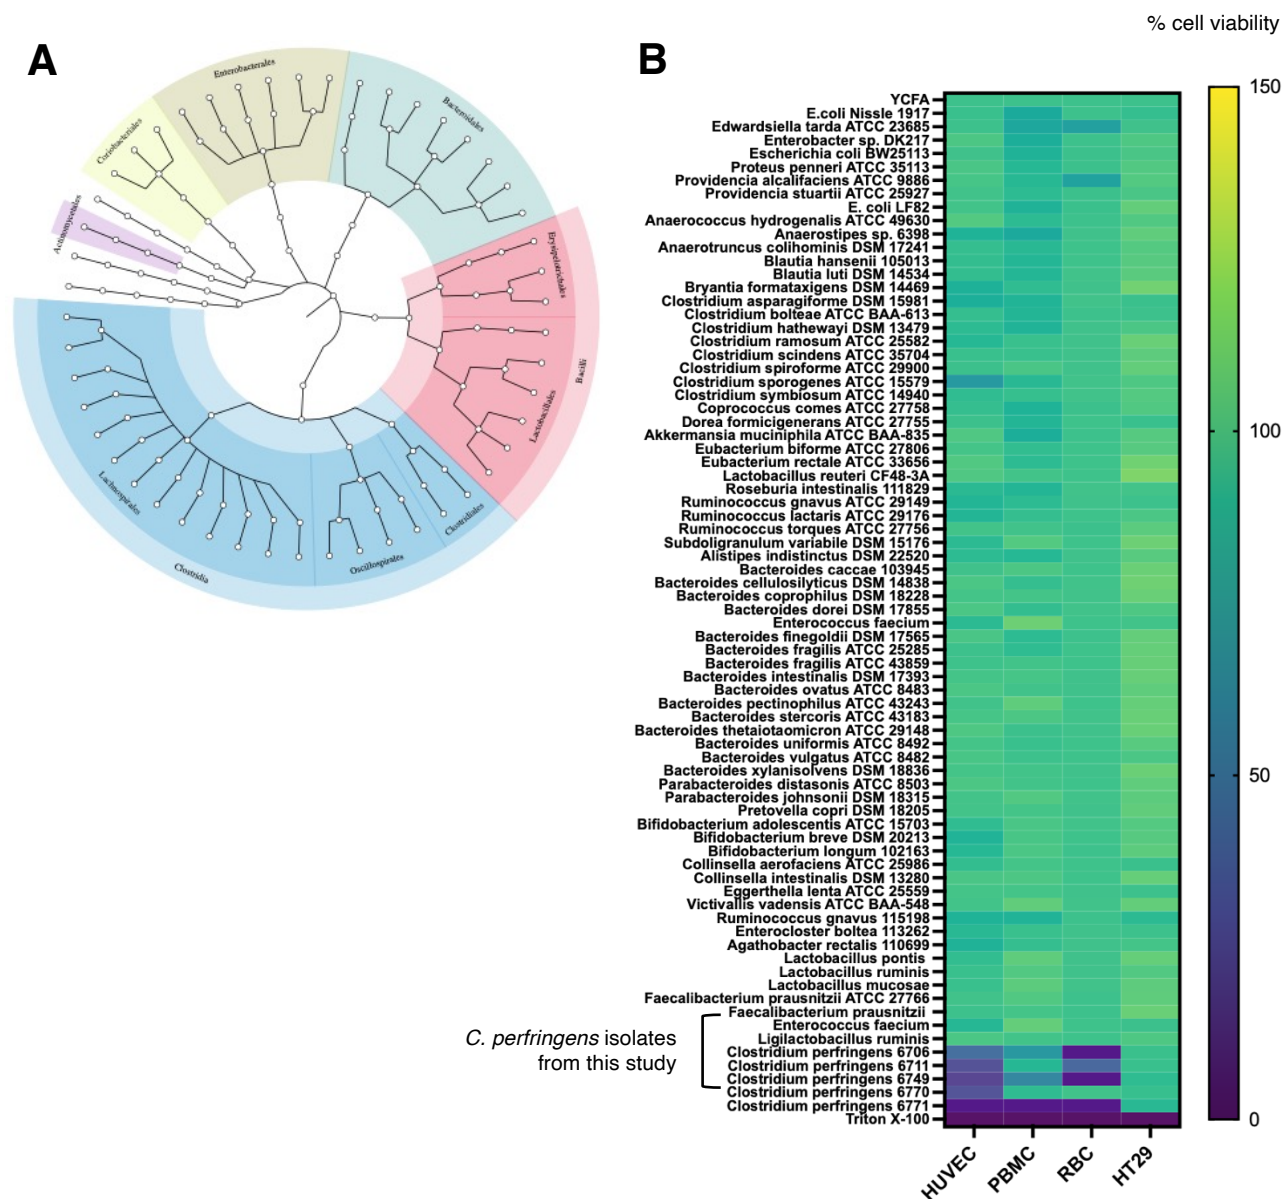

**Supplementary Figure 15. Cell viability is preserved in the presence of diverse bacterial strain supernatants.** (A) Taxonomic tree of 75 bacterial strains representing the broad phyla present in the human gut microbiome. Built using GraPhIA<sup>38</sup>. (B) Bacterial supernatants grown in YCFA were added to HUVECs, PBMCs, HT29 epithelial cells, and RBCs for 20-24 h. Cell viability was measured by CellTiter-Glo. Relative luminescence units (RLU) were log transformed, and values were normalized to media control (100% viable) and Triton X-100 (0% viable).

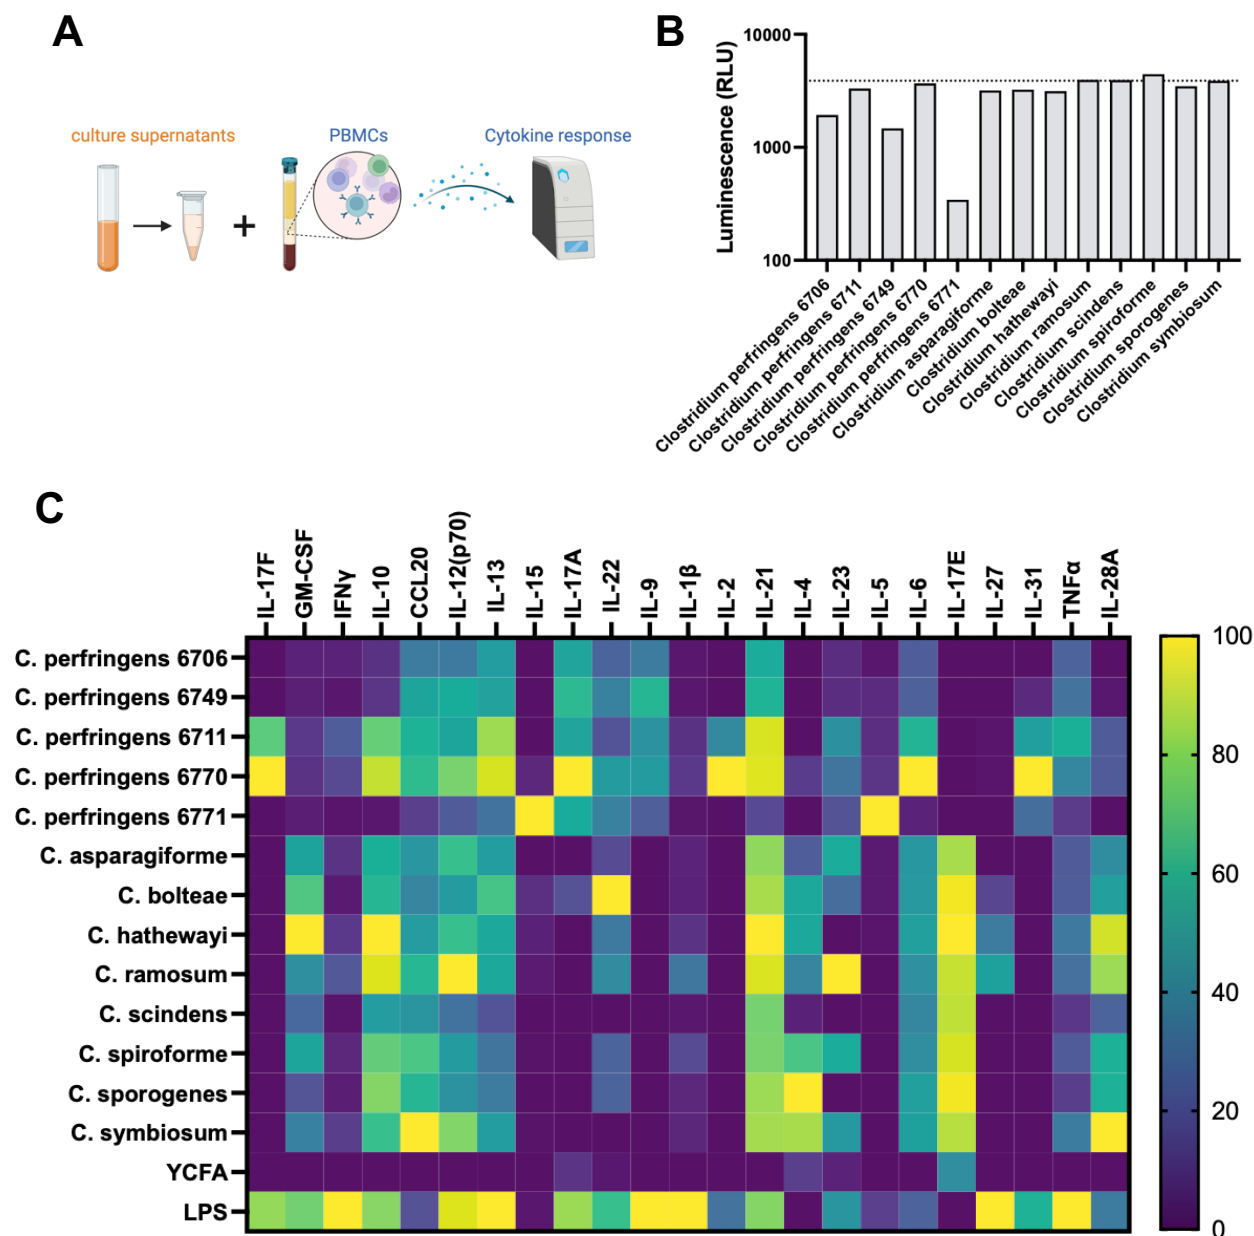

**Supplementary Figure 16. Cytokine response of PBMCs stimulated with *Clostridium* supernatants.** (A) Experimental setup schematic. Individual strains were grown overnight in BHI. 10% bacterial supernatants incubated with isolated peripheral blood mononuclear cells (PBMCs) for 24 hours. Cell supernatants were evaluated with the Bio-Rad 23-plus cytokine luminex assay. (B) PBMC viability was measured by CellTiter-Glo at the end of the assay. Relative light unit readings shown. (C) Cytokine responses are shown as a heat map relative to the highest and lowest values per cytokine in the dataset including YCFA culture media only (0%) and (lipopolysaccharide) LPS-stimulated (100%) controls.

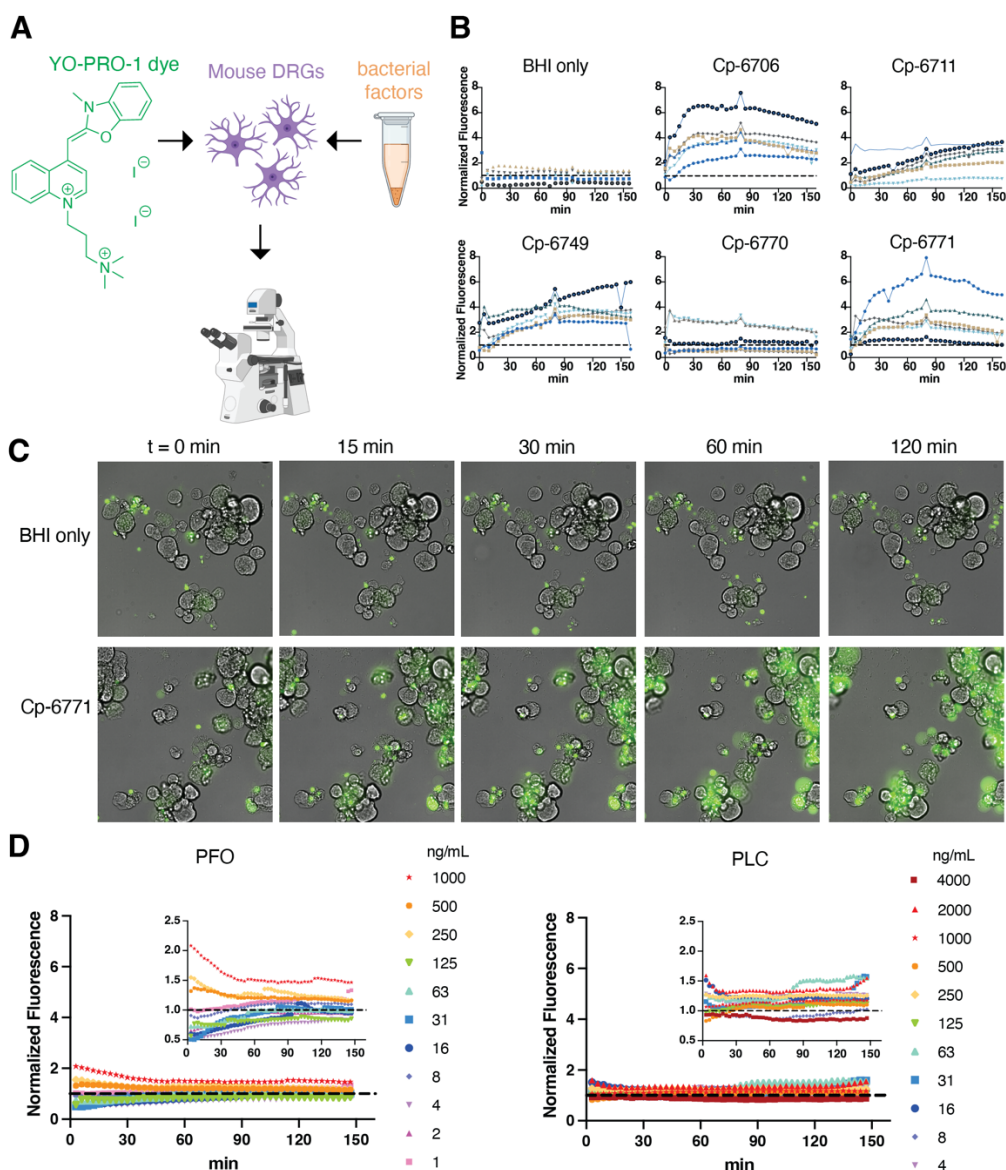

**Supplementary Figure 17. *C. perfringens* supernatants trigger YO-PRO uptake in sensory neurons.**

(A) Experimental setup: isolated mouse DRG neurons were pre-loaded with YO-PRO before live imaging. (B) YO-PRO uptake was monitored by fluorescence microscopy. Individual *C. perfringens* strains were grown overnight in YCFA media, and final concentrations of 10% bacterial supernatants were added to the pre-loaded DRGs. Images were collected every 5 minutes. The normalized fluorescence is displayed from three biological replicates and two image locations within a single well. For each *C. perfringens* strain supernatant, the summed fluorescence intensity from cells was normalized to the average BHI media only trace at each time point. The average YCFA media is shown as a dashed line at  $y = 1$ . Wells with fewer than 20 cells were removed from analysis. (C) Representative time-lapse images with BHI media only or Cp-6771 supernatant. (D) Purified PLC and PFO toxins were added to DRG neurons pre-loaded with YO-PRO. The normalized fluorescence to the media only control (0 ng/mL) from four image locations within a single well is displayed as a dashed line at  $y = 1$ . Images were collected every 3 minutes. Insets are zoomed in on normalized fluorescence 0.5 to 2.5.

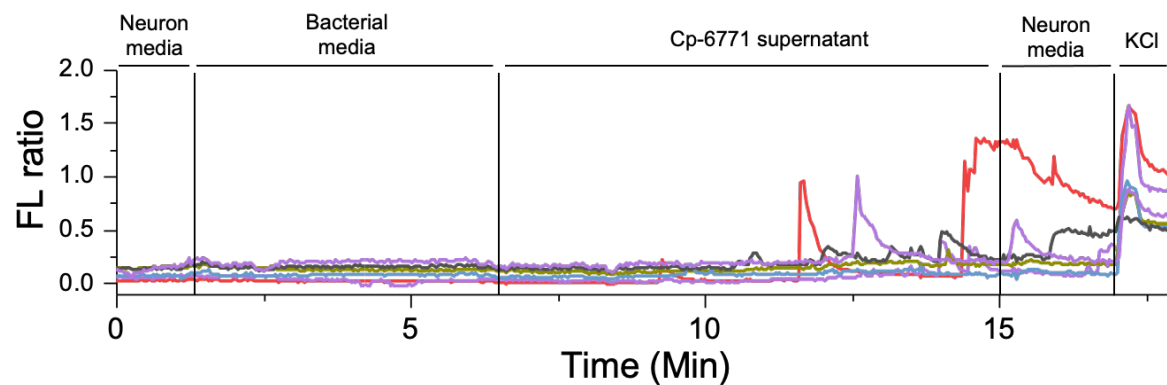

**Supplementary Figure 18. *C. perfringens* supernatants activate DRG sensory neurons.** Calcium signaling in mouse DRG neurons was monitored by the calcium sensitive dye, Fura-2. Neither the addition of neuronal media nor bacterial media activated DRG neurons. Addition of Cp-6771 supernatant triggered calcium signaling through membrane depolarization. The cells all responded to the positive signal from potassium chloride (KCl).

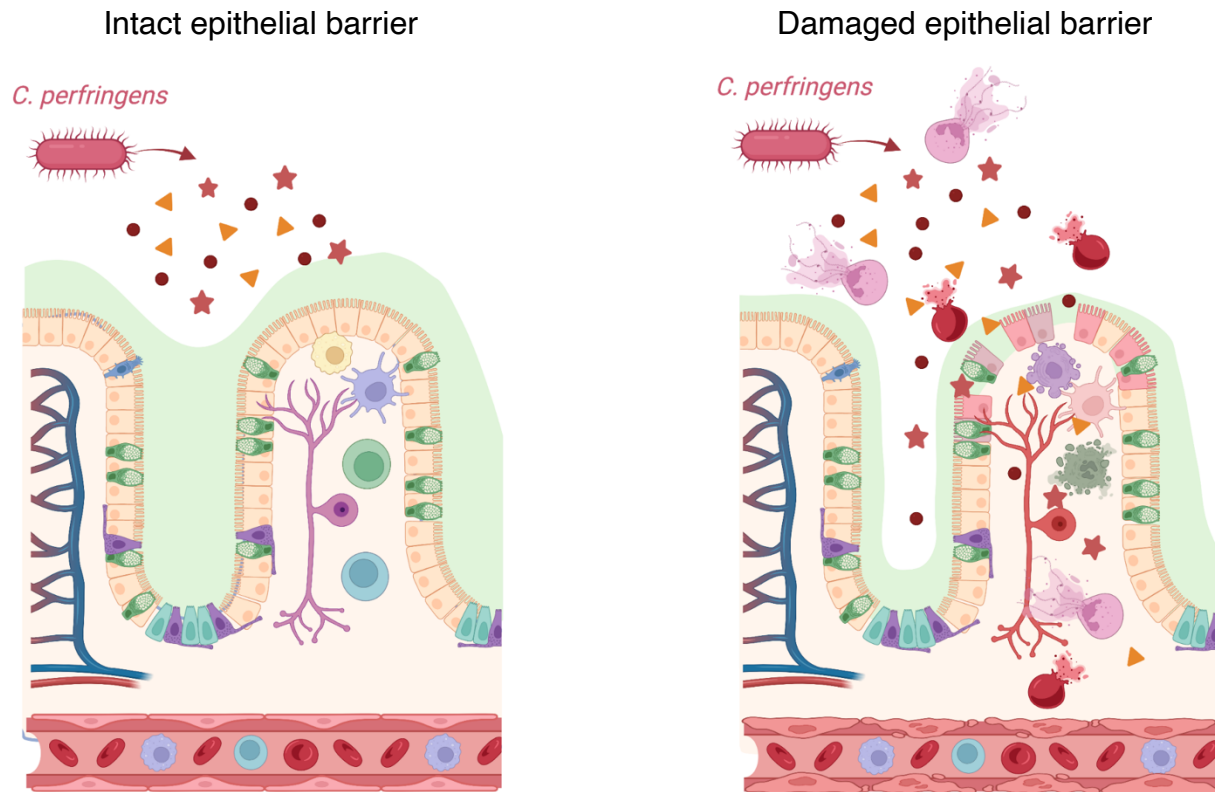

**Supplementary Figure 19. A proposed model for how *C. perfringens* infection may exacerbate tissue damage in patients with impaired intestinal epithelium.** The damaging potential of *C. perfringens* may depend on an intact epithelial barrier. When the epithelial barrier is intact, the effects of toxins secreted from *C. perfringens*, such as PLC (triangles), PFO (stars), and PFO2 (circles), are minimal since they are unable to gain access to the underlying sensitive cell types. When the epithelial barrier is damaged, as in cases of patients with IBD, this exposes sensitive cells (RBCs, neurons, neutrophils, PBMCs, and endothelial cells) to toxin activity, resulting in cell lysis.



## SUPPLEMENTARY VIDEOS

Available online.

**Supplementary Video 1. Caco2 epithelial permeability is induced by *C. perfringens*.** Caco2 epithelial cells were incubated with apoptotic cell permeable fluorescent dye YO-PRO and 10% Cp-6771 bacterial supernatant for live imaging in an Incucyte S3, monitoring YO-PRO uptake. Phase contrast images with green fluorescence show monolayer of cells being damaged. *C. perfringens* strain Cp-6771 was grown overnight in BHI media.

**Supplementary Video 2. Human colonic organoid-derived monolayer epithelial cells mostly resistant to *C. perfringens*.** Colonic organoid-derived monolayer epithelial cells were incubated with apoptotic cell permeable fluorescent dye YO-PRO and 10% Cp-6771 bacterial supernatant for live imaging in an Incucyte S3, monitoring YO-PRO uptake. Phase contrast images with green fluorescence show monolayer of cells remains mostly intact throughout. *C. perfringens* strain Cp-6771 was grown overnight in BHI media.



**Supplementary Table 5. *C. perfringens* sample abundance.** 16S V4 sequencing identified *C. perfringens* in patient biopsies and stool samples. *C. perfringens* abundance in patient samples (top) prior to outgrowth and (middle) after outgrowth of the second passage in BHI. Tabulated values corresponding to **Figure 3B** and **C**. (Bottom) Hemolytic activity of biopsy and stool samples outgrown in BHI expressed as percent lysis compared to the 0.5% Triton X-100 control. Tabulated values correspond to **Figure 2B**.

I. *C. perfringens* percent abundance in patient samples prior to outgrowth

|                     | Ped1 | Ped2 | Ped3 | Ped4 | Ped5 | Ped6 | Ped7 | Ped8 | Ped9 |
|---------------------|------|------|------|------|------|------|------|------|------|
| <b>duodenum-1</b>   | -    | -    | -    | -    | 0.0  | -    | -    | -    | -    |
| <b>duodenum-2</b>   | -    | -    | -    | -    | -    | -    | -    | -    | -    |
| <b>ileum-1</b>      | 22.6 | 0.0  | -    | -    | 0.0  | 26.6 | 0.6  | -    | 0.2  |
| <b>ileum-2</b>      | 24.9 | 0.0  | 0.0  | -    | 0.0  | 31.2 | -    | -    | 0.2  |
| <b>colon-1</b>      | 12.9 | 0.1  | 0.0  | -    | 0.0  | -    | 0.5  | 0.0  | 0.2  |
| <b>colon-2</b>      | -    | 0.0  | 0.0  | 0.0  | 0.0  | 29.5 | -    | 0.0  | 0.1  |
| <b>colonic wash</b> | 1.2  | 0.0  | 0.0  | -    | 8.4  | 1.3  | -    | 0.0  | 0.1  |
| <b>stool</b>        | 0.1  | 0.0  | 0.0  | 0.0  | 0.9  | 0.1  | 0.1  | 0.0  | 0.1  |

"-" sample had < 10,000 reads

II. *C. perfringens* percent abundance in patient samples after outgrowth in BHI

|                     | Ped1 | Ped2 | Ped3 | Ped4 | Ped5 | Ped6 | Ped7 | Ped8 | Ped9 |
|---------------------|------|------|------|------|------|------|------|------|------|
| <b>duodenum-1</b>   | 50.5 | 0.0  | 0.0  | 0.0  | -    | 0.1  | -    | -    | -    |
| <b>duodenum-2</b>   | 15.6 | 0.0  | 0.0  | 0.0  | -    | -    | -    | -    | -    |
| <b>ileum-1</b>      | 6.3  | 0.0  | 0.0  | 0.0  | 0.0  | 16.3 | 3.0  | 0.0  | 0.1  |
| <b>ileum-2</b>      | 10.7 | 0.0  | 0.0  | 0.0  | 0.0  | 21.8 | 4.7  | 0.0  | 9.5  |
| <b>colon-1</b>      | 31.6 | 0.0  | 3.6  | 0.0  | 0.0  | 22.3 | 2.6  | 0.0  | 44.2 |
| <b>colon-2</b>      | 9.7  | 0.0  | 0.0  | 0.0  | 0.0  | 26.4 | 2.0  | 0.0  | 54.8 |
| <b>colonic wash</b> | N/A  | N/A  | N/A  | N/A  | N/A  | N/A  | N/A  | 0.0  | 80.5 |
| <b>stool</b>        | N/A  | N/A  | N/A  | N/A  | N/A  | N/A  | N/A  | 0.0  | 3.5  |

"N/A" - sample type not grown out in BHI

"-" sample had < 10,000 reads

III. Hemolytic activity (%) from BHI outgrown communities

|                     | Ped1 | Ped2 | Ped3 | Ped4 | Ped5 | Ped6 | Ped7 | Ped8 | Ped9 |
|---------------------|------|------|------|------|------|------|------|------|------|
| <b>duodenum-1</b>   | 1.5  | 1.7  | 2.1  | 0.2  | 0.5  | -0.4 | 1.7  | 1.2  | -0.2 |
| <b>duodenum-2</b>   | 0.8  | 1.2  | 2.1  | 0.1  | 0.4  | -1.1 | 1.7  | 0.4  | 0.4  |
| <b>ileum-1</b>      | 58.2 | 1.5  | 2.4  | -0.1 | -0.1 | 85.3 | 13.8 | -0.1 | 0.1  |
| <b>ileum-2</b>      | 91.0 | 0.4  | 1.7  | -0.2 | 0.6  | 86.7 | 31.3 | 0.0  | 0.3  |
| <b>colon-1</b>      | 77.5 | 1.0  | 79.9 | -0.3 | 0.0  | 85.9 | 7.5  | 0.0  | 98.1 |
| <b>colon-2</b>      | 78.9 | 1.1  | 2.2  | -0.3 | 1.9  | 85.0 | 5.5  | -0.1 | 99.8 |
| <b>colonic wash</b> | N/A  | N/A  | N/A  | N/A  | N/A  | N/A  | N/A  | -1.3 | 96.0 |
| <b>stool</b>        | N/A  | N/A  | N/A  | N/A  | N/A  | N/A  | N/A  | -1.2 | 0.0  |

"N/A" - sample type not grown out in BHI

**Supplementary Table 6. Metagenomic datasets used in analyzing *C. perfringens* prevalence in “healthy” and “control” and IBD populations.**

Available online.

**Supplementary Table 7. Summary of *C. perfringens* genome quality as assessed using CheckM.**

All strains are marker lineage o\_\_Clostridiales (UID1375) for the taxonomic rank of the lineage-specific marker set used to estimate genome completeness, contamination, and strain heterogeneity.

| Strain  | (a) # genomes | (b) # markers | (c) # marker sets | (d) 0 | (d) 1 | (d) 2 | (d) 3 | (d) 4 | (d) 5+ | (e) Completeness | (f) Contamination | (g) Strain heterogeneity |
|---------|---------------|---------------|-------------------|-------|-------|-------|-------|-------|--------|------------------|-------------------|--------------------------|
| Cp-6706 | 50            | 332           | 124               | 0     | 332   | 0     | 0     | 0     | 0      | 100              | 0                 | 0                        |
| Cp-6711 | 50            | 332           | 124               | 0     | 332   | 0     | 0     | 0     | 0      | 100              | 0                 | 0                        |
| Cp-6749 | 50            | 332           | 124               | 0     | 332   | 0     | 0     | 0     | 0      | 100              | 0                 | 0                        |
| Cp-6770 | 50            | 332           | 124               | 0     | 331   | 1     | 0     | 0     | 0      | 100              | 0.81              | 0                        |
| Cp-6771 | 50            | 332           | 124               | 0     | 332   | 0     | 0     | 0     | 0      | 100              | 0                 | 0                        |

(a) number of reference genomes used to infer the lineage-specific marker set

(b) number of marker genes within the inferred lineage-specific marker set

(c) number of co-located marker sets within the inferred lineage-specific marker set

(d) 0-5+: number of times each marker gene is identified

(e) estimated completeness of genome as determined from the presence/absence of marker genes and the expected colocalization of these genes

(f) estimated contamination of genome as determined by the presence of multi-copy marker genes and the expected colocalization of these genes

(g) estimated strain heterogeneity as determined from the number of multi-copy marker pairs which exceed a specified amino acid identity threshold

**Supplementary Table 8. Assembly metrics for *C. perfringens* isolate strains sequenced.** Strains were sequenced by Illumina whole-genome sequencing. Compared to *C. perfringens* ATCC 13124 (NCBI RefSeq GCF\_000013285.1), the type strain sequenced by others (including other *C. perfringens* strains) in a different work<sup>35</sup> and CPI 18-6 (NCBI Accession GCF\_020138775.1).

| Strain      | Genome size (bp) | % GC | Genome Status | Contigs | N50 (bp) | Mean contig length (bp) | Longest contig (bp) |
|-------------|------------------|------|---------------|---------|----------|-------------------------|---------------------|
| Cp-6706     | 3324615          | 28.0 | draft         | 48      | 197007   | 69262                   | 755967              |
| Cp-6711     | 3239695          | 28.1 | draft         | 37      | 248819   | 87559                   | 902872              |
| Cp-6749     | 3328069          | 28.0 | draft         | 39      | 370148   | 85335                   | 913122              |
| Cp-6770     | 3220289          | 28.1 | draft         | 46      | 200106   | 70006                   | 331103              |
| Cp-6771     | 3211615          | 28.1 | draft         | 30      | 387197   | 107053                  | 922488              |
| ATCC 13124* | 3256683          | 28.4 | complete      | -       | -        | -                       | -                   |
| CPI 18-6*   | 3275434          | 28.5 | complete      | -       | -        | -                       | -                   |

\*not sequenced in this work

**Supplementary Table 9. *C. perfringens* isolate genomes encode diverse sets of virulence factors.**

*C. perfringens* isolates from each patient were individually whole genome sequenced and analyzed with the virulence factor database (VFDB)<sup>20</sup>. All virulence factors identified are displayed with the percent identity to the reference virulence factor is shown. List of virulence factors searched for: alpha-toxin (*plc*), beta-toxin (*cpb*), beta2-toxin (*cpb2*), *Clostridium perfringens* enterotoxin (*cpe*), epsilon toxin (*etx*), iota-toxin, necrotic enteritis toxin B (*netB*), perfringolysin O (*pfoA*), perfringolysin O-2 (*pfo2*, alveolysin), alpha-clostripain (*cloSI*), kappa-toxin (*colA*, collagenase), mu-toxin, hyaluronidases (*nagH*, *nagl*, *nagJ*, *nagK*, *nagL*), and sialidases (*nanH*, *nanI*, and *nanJ*). Toxin genes not found in any strains are not shown in the table.

| Patient | Strain  | <i>pfoA</i> | <i>pfo2</i> | <i>plc</i> | <i>cloSI</i> | <i>colA</i> | <i>nagH</i> | <i>nagl</i> | <i>nagJ</i> | <i>nagK</i> | <i>nagL</i> | <i>nanH</i> | <i>nanI</i> | <i>nanJ</i> |
|---------|---------|-------------|-------------|------------|--------------|-------------|-------------|-------------|-------------|-------------|-------------|-------------|-------------|-------------|
| 1       | Cp-6706 | 100         | 92.95       | 100        | 100          | 100         | 100         | 100         | 100         | 99.74       | 99.97       | 100         | 100         | 99.97       |
| 3       | Cp-6711 | 100         | -           | 100        | 100          | 100         | 100         | 100         | 100         | 100         | 100         | 100         | 99.95       | 99.97       |
| 6       | Cp-6749 | 100         | 92.95       | 100        | 100          | 100         | 100         | 100         | 100         | 100         | 99.73       | 100         | 100         | 99.97       |
| 7       | Cp-6770 | -           | -           | 100        | 100          | 100         | 100         | 100         | 100         | 100         | 100         | 100         | 100         | 99.97       |
| 9       | Cp-6771 | 100         | -           | 100        | 100          | 100         | 99.94       | 99.92       | 100         | 100         | -           | 100         | 100         | 99.97       |

Supplementary Table 10. Bacterial strains.

| Name                                            | Species                                       | Description                                            | Source       |
|-------------------------------------------------|-----------------------------------------------|--------------------------------------------------------|--------------|
| <b>UCSF Pediatric Patient Isolate Strains</b>   |                                               |                                                        |              |
| Cp-6706                                         | <i>Clostridium perfringens</i>                | from Patient 1                                         | this study   |
| Cp-6711                                         | <i>Clostridium perfringens</i>                | from Patient 3                                         | this study   |
| Cp-6749                                         | <i>Clostridium perfringens</i>                | from Patient 6                                         | this study   |
| Cp-6770                                         | <i>Clostridium perfringens</i>                | from Patient 7                                         | this study   |
| Cp-6771                                         | <i>Clostridium perfringens</i>                | from Patient 9                                         | this study   |
| <b>Intron-integration mutants</b>               |                                               |                                                        |              |
| Cp-6711_pfoA                                    | <i>Clostridium perfringens</i>                | pfoA intron insertion mutant, made with plasmid pJK758 | this study   |
| Cp-6711_plc                                     | <i>Clostridium perfringens</i>                | plc intron insertion mutant, made with plasmid pJK760  | this study   |
| Cp-6749_plc                                     | <i>Clostridium perfringens</i>                | plc intron insertion mutant, made with plasmid pJK761  | this study   |
| Cp-6771_pfoA                                    | <i>Clostridium perfringens</i>                | pfoA intron insertion mutant, made with plasmid pJK757 | this study   |
| Cp-6771_plc                                     | <i>Clostridium perfringens</i>                | plc intron insertion mutant, made with plasmid pJK760  | this study   |
| <b>Conjugation Strains (<i>E. coli</i>)</b>     |                                               |                                                        |              |
|                                                 | <i>Escherichia coli</i>                       | CA434                                                  | Nigel Minton |
| <b>Other Gut bacterial strains<sup>39</sup></b> |                                               |                                                        |              |
|                                                 | Species                                       | Strain                                                 | Source       |
|                                                 | <i>Bifidobacterium adolescentis</i>           | ATCC 15703                                             | ATCC         |
|                                                 | <i>Bifidobacterium breve</i>                  | DSM 20213                                              | ATCC         |
|                                                 | <i>Bifidobacterium longum subsp. Infantis</i> | CCUG 52486                                             | ATCC         |
|                                                 | <i>Bifidobacterium ruminatum</i>              | fecal isolate                                          | ATCC         |
|                                                 | <i>Collinsella aerofaciens</i>                | ATCC 25986                                             | ATCC         |
|                                                 | <i>Collinsella intestinalis</i>               | DSM 13280                                              | ATCC         |
|                                                 | <i>Eggerthella lenta</i>                      | ATCC 25559                                             | ATCC         |
|                                                 | <i>Alistipes indistinctus</i>                 | DSM 22520                                              | ATCC         |
|                                                 | <i>Bacteroides caccae</i>                     | ATCC 43185                                             | ATCC         |
|                                                 | <i>Bacteroides cellulosilyticus</i>           | DSM 14838                                              | ATCC         |
|                                                 | <i>Bacteroides coprophilus</i>                | DSM 18228                                              | ATCC         |
|                                                 | <i>Bacteroides dorei</i>                      | DSM 17855                                              | ATCC         |
|                                                 | <i>Bacteroides eggerthii</i>                  | DSM 20697                                              | ATCC         |
|                                                 | <i>Bacteroides fingoldii</i>                  | DSM 17565                                              | ATCC         |
|                                                 | <i>Bacteroides fragilis</i>                   | NCTC 9343                                              | ATCC         |
|                                                 | <i>Bacteroides fragilis</i>                   | 3397 (T10)                                             | ATCC         |
|                                                 | <i>Bacteroides fragilis</i>                   | T(B)9                                                  | ATCC         |
|                                                 | <i>Bacteroides fragilis</i>                   | DS-208                                                 | ATCC         |
|                                                 | <i>Bacteroides fragilis</i>                   | HMW 610                                                | ATCC         |
|                                                 | <i>Bacteroides fragilis</i>                   | HMW 615                                                | ATCC         |
|                                                 | <i>Bacteroides fragilis</i>                   | ATCC 43859                                             | ATCC         |
|                                                 | <i>Bacteroides intestinalis</i>               | DSM 17393                                              | ATCC         |
|                                                 | <i>Bacteroides ovatus</i>                     | ATCC 8483                                              | ATCC         |
|                                                 | <i>Bacteroides pectinophilus</i>              | ATCC 43243                                             | ATCC         |
|                                                 | <i>Bacteroides stercoris</i>                  | ATCC 43183                                             | ATCC         |
|                                                 | <i>Bacteroides thetaiotaomicron</i>           | VPI-5482                                               | ATCC         |
|                                                 | <i>Bacteroides thetaiotaomicron</i>           | 3731                                                   | ATCC         |
|                                                 | <i>Bacteroides thetaiotaomicron</i>           | 7330                                                   | ATCC         |
|                                                 | <i>Bacteroides uniformis</i>                  | ATCC 8492                                              | ATCC         |
|                                                 | <i>Bacteroides vulgatus</i>                   | ATCC 8482                                              | ATCC         |
|                                                 | <i>Bacteroides WH2</i>                        | WH2                                                    | ATCC         |
|                                                 | <i>Bacteroides xylanisolvens</i>              | DSM 18836                                              | ATCC         |
|                                                 | <i>Odoribacter splanchnius</i>                | fecal isolate                                          | ATCC         |
|                                                 | <i>Parabacteroides distasonis</i>             | ATCC 8503                                              | ATCC         |
|                                                 | <i>Parabacteroides johnsonii</i>              | DSM 18315                                              | ATCC         |
|                                                 | <i>Parabacteroides merdae</i>                 | ATCC 43184                                             | ATCC         |
|                                                 | <i>Pretovella copri</i>                       | DSM 18205                                              | ATCC         |

| (cont'd) | Species                              | Strain                | Source |
|----------|--------------------------------------|-----------------------|--------|
|          | <i>Anaerococcus hydrogenalis</i>     | DSM 7454              | ATCC   |
|          | <i>Anaerostipes</i> sp.              | fecal isolate         | ATCC   |
|          | <i>Anaerotruncus colihominis</i>     | DSM 17241             | ATCC   |
|          | <i>Blautia hansenii</i>              | DSM 20583             | ATCC   |
|          | <i>Blautia luti</i>                  | DSM 14534             | ATCC   |
|          | <i>Bryantia formataxigens</i>        | DSM 14469             | ATCC   |
|          | <i>Clostridium asparagiforme</i>     | DSM 15981             | ATCC   |
|          | <i>Clostridium bolteae</i>           | ATCC BAA-613          | ATCC   |
|          | <i>Clostridium difficile</i>         | 120                   | ATCC   |
|          | <i>Clostridium hathewayi</i>         | DSM 13479             | ATCC   |
|          | <i>Clostridium</i> sp.               | fecal isolate         | ATCC   |
|          | <i>Clostridium ramosum</i>           | ATCC 25582 / DSM 1402 | ATCC   |
|          | <i>Clostridium scindens</i>          | ATCC 35704            | ATCC   |
|          | <i>Clostridium spiroforme</i>        | ATCC 29900 / DSM 1552 | ATCC   |
|          | <i>Clostridium sporogenes</i>        | ATCC 15579            | ATCC   |
|          | <i>Clostridium symbiosum</i>         | ATCC 14940            | ATCC   |
|          | <i>Coprococcus comes</i>             | ATCC 27758            | ATCC   |
|          | <i>Dorea formicigenerans</i>         | ATCC 27755            | ATCC   |
|          | <i>Enterococcus faecalis</i>         | V583                  | ATCC   |
|          | <i>Eubacterium bifforme</i>          | DSM 3989              | ATCC   |
|          | <i>Eubacterium hallii</i>            | DSM 3353              | ATCC   |
|          | <i>Eubacterium rectale</i>           | ATCC 33656            | ATCC   |
|          | <i>Eubacterium ventriosum</i>        | ATCC 27560            | ATCC   |
|          | <i>Lactobacillus reuteri</i> CF48-3A | BEI HM-102            | ATCC   |
|          | <i>Roseburia intestinalis</i>        | L1-82                 | ATCC   |
|          | <i>Ruminococcus gnavus</i>           | ATCC 29149            | ATCC   |
|          | <i>Ruminococcus lactaris</i>         | ATCC 29176            | ATCC   |
|          | <i>Ruminococcus torques</i>          | ATCC 27756            | ATCC   |
|          | <i>Subdoligranulum variabile</i>     | DSM 15176             | ATCC   |
|          | <i>Victivallis vadensis</i>          | ATCC BAA-548          | ATCC   |
|          | <i>Edwardsiella tarda</i>            | ATCC 23685            | ATCC   |
|          | <i>Enterobacter cancerogenus</i>     | ATCC 35316            | ATCC   |
|          | <i>Escherichia coli</i>              | BW25113               | ATCC   |
|          | <i>Proteus penneri</i>               | ATCC 35198            | ATCC   |
|          | <i>Providencia alcalifaciens</i>     | DSM 30120             | ATCC   |
|          | <i>Providencia rettgeri</i>          | DSM 1131              | ATCC   |
|          | <i>Providencia stuartii</i>          | ATCC 25827            | ATCC   |
|          | <i>Salmonella typhimurium</i>        | LT2                   | ATCC   |
|          | <i>Akkermansia muciniphila</i>       | ATCC BAA-835          | ATCC   |

Supplementary Table 11. Primers used in this study.

| Use                                    | Name          | DNA Sequence (5' to 3')                                    | Source                           |
|----------------------------------------|---------------|------------------------------------------------------------|----------------------------------|
| <b>pGM-ACAQ plasmid assembly</b>       |               |                                                            |                                  |
|                                        | j241          | CGCCGATGGTAGTGTGGGGTCT                                     | this study                       |
|                                        | j242          | GATGGCTTGTAGATATGACGACAGGAAGAGTTTGTAGAAACGCA<br>AAAAGGCC   | this study                       |
|                                        | j243          | CGTCATATCTACAAGCCATCCCCCACAGATACGGCCATTATTT<br>TTTTGAACAAT | this study                       |
|                                        | j244          | TATACCACATTTTTGTGAATTTTTGCTTATAATCCATAACAATC<br>ATC        | this study                       |
|                                        | j245          | CTTCGGGACTCATAGAATTATTTT                                   | this study                       |
|                                        | j246          | ATGAACAAAATATAAAATATTCTC                                   | this study                       |
|                                        | j247          | ATGCACTCGTAGTAGTCTGAGAAG                                   | this study                       |
|                                        | j248          | ACATTCACCTGTGTTTATGAATCAC                                  | this study                       |
|                                        | j249          | ACACCTGCAGGGGGCCCGATCGG attgcggttgcgctcact                 | this study                       |
|                                        | j250          | CGCCGATGGTAGTGTGGGGTCTCCCC gccgcatagttaagcca               | this study                       |
|                                        | j251          | AGACCCCACTACCATCGGCG attgcggttgcgctcact                    | this study                       |
|                                        | j252          | CCGATCGGGCCCCCTGCAGGGTGT gccgcatagttaagcca                 | this study                       |
|                                        | j253          | TCAAGGTGTACTGCCTTC                                         | this study                       |
|                                        | j254          | TCAAGAAGAGCGACTTC                                          | this study                       |
|                                        | j255          | cgtcggttaaatgccctt                                         | this study                       |
|                                        | j256          | TGCTCGACATTCCTTG                                           | this study                       |
|                                        | j268          | tttattacgtggcgacg                                          | this study                       |
|                                        | j269          | catatatggctagatcg                                          | this study                       |
|                                        | j270          | tgtctgtaagcggatgc                                          | this study                       |
|                                        | j271          | taatgaccccgaagcag                                          | this study                       |
|                                        | j272          | acagaggaaagcagtat                                          | this study                       |
|                                        | j273          | ccgatcggggccccctgca                                        | this study                       |
|                                        | j274          | ggggagaccccacactaccatcg                                    | this study                       |
|                                        | j275          | cgccgatggtagtggtgggtctcc                                   | this study                       |
|                                        | j276          | acaccctgcagggggcccgat                                      | this study                       |
|                                        | j277          | cttctcagactactacgagtg                                      | this study                       |
|                                        | j278          | gtgattcataaacacaagtgaatgtcgag                              | this study                       |
|                                        | j279          | tcaaaaaataatggcgtatctgtg                                   | this study                       |
|                                        | j280          | ggatgattgttatggattataagcaa                                 | this study                       |
|                                        | j281          | tctgtgacactgtcagac                                         | this study                       |
| <b><i>C. perfringens</i> toxin PCR</b> |               |                                                            |                                  |
| plc                                    | Cper-plc508-F | CCGTTGATAGCGCAGGACA                                        | Nagpal et al. 2015 <sup>37</sup> |
|                                        | Cper-plc508-R | CCCAACTATGACTCATGCTAGCA                                    | Nagpal et al. 2015 <sup>37</sup> |
| plc(2)                                 | j361          | CTAGATATGAATGGCAAAGAGGAAAC                                 | this study                       |
|                                        | j362          | TAACATGTCCTGCGCTATCAA                                      | this study                       |
| 16S ( <i>C. perfringens</i> )          | s-Clper-F     | GGGGGTTTCAACACCTCC                                         | Nagpal et al. 2015 <sup>37</sup> |
|                                        | CIPER-R       | GCAAGGGATGTCAAGTGT                                         | Nagpal et al. 2015 <sup>37</sup> |
| pfoA (Cp-6706, Cp-6749)                | j365          | CAGTTGCTGCTGTTTACAATAA                                     | this study                       |
|                                        | j366          | TGAAACTTCATCCCATGCTACT                                     | this study                       |
| pfoA (Cp-6711, Cp-6771)                | j367          | CAGTTGCTGCTGTTTACAATAA                                     | this study                       |
|                                        | j368          | TCATCCCAGGCTACTTCAAAC                                      | this study                       |
| pfo2 (Cp-6706)                         | j369          | AGTGCAGCCTTACCCTAATAACC                                    | this study                       |
|                                        | j370          | TTCCATAAGCCACATTTGAAACC                                    | this study                       |
| pfo2 (Cp-6749)                         | j371          | AGTGCAGCCTTGCCCTAATAA                                      | this study                       |
|                                        | j372          | CCATAAGCCACATTTGAAACCA                                     | this study                       |
| agrD                                   | j373          | GCTGCATTAAACAACAGTAGTTGC                                   | this study                       |
|                                        | j374          | GTTCTCTGGTTGGTGTGTAAA                                      | this study                       |



**Supplementary Table 12. Sequences: Group II introns for insertion mutants of *pfoA*, *plc*.** Introns in pGM-ACAQ (pCB102 origin of replication)<sup>9</sup>.

| Name   | Description     | DNA Sequence (5' to 3')                                                                                                                                                                                                                                                                                                                 |
|--------|-----------------|-----------------------------------------------------------------------------------------------------------------------------------------------------------------------------------------------------------------------------------------------------------------------------------------------------------------------------------------|
| pJK757 | Cp_pfoA intron  | TTATCCTTAGAATCCATACTTGTGCGCCCAGATAGGGTGTTAAGTCAAGTAGTTTAAGGTACTACTC<br>TGTAAGATAACACAGAAAACAGCCAACCTAACCGAAAAGCGAAAGCTGATACGGGAACAGAGCACGG<br>TTGGAAAGCGATGAGTTACCTAAAGACAATCGGGTACGACTGAGTCGCAATGTTAATCAGATATAAG<br>GTATAAGTTGTGTTTACTGAACGCAAGTTTCTAATTTTCGATTGATTCTCGATAGAGGAAAGTGTCTG<br>AAACCTCTAGTACAAAGAAAGGTAAGTTACAAAGTATGACT  |
| pJK758 | Cp_pfoA intron2 | TTATCCTTAATTGCCATACTTGTGCGCCCAGATAGGGTGTTAAGTCAAGTAGTTTAAGGTACTACTC<br>TGTAAGATAACACAGAAAACAGCCAACCTAACCGAAAAGCGAAAGCTGATACGGGAACAGAGCACGG<br>TTGGAAAGCGATGAGTTACCTAAAGACAATCGGGTACGACTGAGTCGCAATGTTAATCAGATATAAG<br>GTATAAGTTGTGTTTACTGAACGCAAGTTTCTAATTTTCGTTGCAATCCGATAGAGGAAAGTGTCTG<br>AAACCTCTAGTACAAAGAAAGGTAAGTTAGCAAGTATGACT   |
| pJK760 | Cp_plc intron   | TTATCCTTAGGAACCCATGCTGTGCGCCCAGATAGGGTGTTAAGTCAAGTAGTTTAAGGTACTACTC<br>TGTAAGATAACACAGAAAACAGCCAACCTAACCGAAAAGCGAAAGCTGATACGGGAACAGAGCACGG<br>TTGGAAAGCGATGAGTTACCTAAAGACAATCGGGTACGACTGAGTCGCAATGTTAATCAGATATAAG<br>GTATAAGTTGTGTTTACTGAACGCAAGTTTCTAATTTTCGATTGTTCTCGATAGAGGAAAGTGTCTG<br>AAACCTCTAGTACAAAGAAAGGTAAGTTAATAGCATGGACT   |
| pJK761 | Cp_plc intron2  | TTATCCTTAGTTTTTCGCAAAGTGTGCGCCCAGATAGGGTGTTAAGTCAAGTAGTTTAAGGTACTACTC<br>TGTAAGATAACACAGAAAACAGCCAACCTAACCGAAAAGCGAAAGCTGATACGGGAACAGAGCACGG<br>TTGGAAAGCGATGAGTTACCTAAAGACAATCGGGTACGACTGAGTCGCAATGTTAATCAGATATAAG<br>GTATAAGTTGTGTTTACTGAACGCAAGTTTCTAATTTTCGATTAAACTCGATAGAGGAAAGTGTCTG<br>AAACCTCTAGTACAAAGAAAGGTAAGTTAGGTTTTGCGACT |

**SUPPLEMENTARY REFERENCES**

1. Javdan B, Lopez JG, Chankhamjon P, Lee YCJ, Hull R, Wu Q, Wang X, Chatterjee S, Donia MS. Personalized Mapping of Drug Metabolism by the Human Gut Microbiome. *Cell*. 2019;181(7):1661-1679.e22. doi:10.1016/j.cell.2020.05.001
2. Ng KM, Pannu S, Liu S, Burckhardt JC, Hughes T, Treuren WV, Nguyen J, Naqvi K, Nguyen B, Clayton CA, Pepin DM, Collins SR, Tropini C. Single-strain behavior predicts responses to environmental pH and osmolality in the gut microbiota. *mBio*. Published online 2023:e00753-23. doi:10.1128/mbio.00753-23
3. Ladirat SE, Schols HA, Nauta A, Schoterman MHC, Keijser BJB, Montijn RC, Gruppen H, Schuren FHJ. High-throughput analysis of the impact of antibiotics on the human intestinal microbiota composition. *J Microbiol Methods*. 2013;92(3):387-397. doi:10.1016/j.mimet.2012.12.011
4. Abbeele PV den, Grootaert C, Marzorati M, Possemiers S, Verstraete W, Gérard P, Rabot S, Bruneau A, Aidy SE, Derrien M, Zoetendal E, Kleerebezem M, Smidt H, Wiele TV de. Microbial community development in a dynamic gut model is reproducible, colon region specific, and selective for Bacteroidetes and Clostridium cluster IX. *Appl Environ Microbiol*. 2010;76(15):5237-5246. doi:10.1128/aem.00759-10
5. Jalili-Firoozinezhad S, Gazzaniga FS, Calamari EL, Camacho DM, Fadel CW, Bein A, Swenor B, Nestor B, Crounce MJ, Tovaglieri A, Levy O, Gregory KE, Breault DT, Cabral JMS, Kasper DL, Novak R, Ingber DE. A complex human gut microbiome cultured in an anaerobic intestine-on-a-chip. *Nat Biomed Eng*. 2019;3(7):520-531. doi:10.1038/s41551-019-0397-0
6. Wang K, Zhang Z, Hang J, Liu J, Guo F, Ding Y, Li M, Nie Q, Lin J, Zhuo Y, Sun L, Luo X, Zhong Q, Ye C, Yun C, Zhang Y, Wang J, Bao R, Pang Y, Wang G, Gonzalez FJ, Lei X, Qiao J, Jiang C. Microbial-host-isozyme analyses reveal microbial DPP4 as a potential antidiabetic target. *Science*. 2023;381(6657):eadd5787. doi:10.1126/science.add5787
7. Adcock PW, Saint CP. Rapid confirmation of *Clostridium perfringens* by using chromogenic and fluorogenic substrates. *Appl Environ Microb*. 2001;67(9):4382-4384. doi:10.1128/aem.67.9.4382-4384.2001
8. Heap JT, Kuehne SA, Ehsaan M, Cartman ST, Cooksley CM, Scott JC, Minton NP. The Clostron: Mutagenesis in *Clostridium* refined and streamlined. *J Microbiol Methods*. 2010;80(1):49-55. doi:10.1016/j.mimet.2009.10.018
9. Jin WB, Li TT, Huo D, Qu S, Li XV, Arifuzzaman M, Lima SF, Shi HQ, Wang A, Putzel GG, Longman RS, Artis D, Guo CJ. Genetic manipulation of gut microbes enables single-gene interrogation in a complex microbiome. *Cell*. 2022;185(3):547-562.e22. doi:10.1016/j.cell.2021.12.035
10. Caporaso JG, Lauber CL, Walters WA, Berg-Lyons D, Huntley J, Fierer N, Owens SM, Betley J, Fraser L, Bauer M, Gormley N, Gilbert JA, Smith G, Knight R. Ultra-high-throughput

microbial community analysis on the Illumina HiSeq and MiSeq platforms. *Isme J.* 2012;6(8):1621-1624. doi:10.1038/ismej.2012.8

11. Mar JS, Ota N, Pokorzynski ND, Peng Y, Jaochico A, Sangaraju D, Skippington E, Lekkerkerker AN, Rothenberg ME, Tan MW, Yi T, Keir ME. IL-22 alters gut microbiota composition and function to increase aryl hydrocarbon receptor activity in mice and humans. *Microbiome.* 2023;11(1):47. doi:10.1186/s40168-023-01486-1
  
12. Bolyen E, Rideout JR, Dillon MR, Bokulich NA, Abnet CC, Al-Ghalith GA, Alexander H, Alm EJ, Arumugam M, Asnicar F, Bai Y, Bisanz JE, Bittinger K, Brejnrod A, Brislawn CJ, Brown CT, Callahan BJ, Caraballo-Rodríguez AM, Chase J, Cope EK, Silva RD, Diener C, Dorrestein PC, Douglas GM, Durall DM, Duvallet C, Edwardson CF, Ernst M, Estaki M, Fouquier J, Gauglitz JM, Gibbons SM, Gibson DL, Gonzalez A, Gorlick K, Guo J, Hillmann B, Holmes S, Holste H, Huttenhower C, Huttley GA, Janssen S, Jarmusch AK, Jiang L, Kaehler BD, Kang KB, Keefe CR, Keim P, Kelley ST, Knights D, Koester I, Kosciolk T, Kreps J, Langille MGI, Lee J, Ley R, Liu YX, Lofffield E, Lozupone C, Maher M, Marotz C, Martin BD, McDonald D, McIver LJ, Melnik AV, Metcalf JL, Morgan SC, Morton JT, Naimey AT, Navas-Molina JA, Nothias LF, Orchanian SB, Pearson T, Peoples SL, Petras D, Preuss ML, Pruesse E, Rasmussen LB, Rivers A, Robeson MS, Rosenthal P, Segata N, Shaffer M, Shiffer A, Sinha R, Song SJ, Spear JR, Swafford AD, Thompson LR, Torres PJ, Trinh P, Tripathi A, Turnbaugh PJ, Ul-Hasan S, Hooft JJJ van der, Vargas F, Vázquez-Baeza Y, Vogtmann E, et al. Reproducible, interactive, scalable and extensible microbiome data science using QIIME 2. *Nat Biotechnol.* 2019;37(8):852-857. doi:10.1038/s41587-019-0209-9
  
13. Wagner F, Mansfield JC, Lekkerkerker AN, Wang Y, Keir M, Dash A, Butcher B, Harder B, Orozco LD, Mar JS, Chen H, Rothenberg ME. Dose escalation randomised study of efmarodocokin alfa in healthy volunteers and patients with ulcerative colitis. *Gut.* 2023;72(8):1451-1461. doi:10.1136/gutjnl-2022-328387
  
14. Callahan BJ, McMurdie PJ, Rosen MJ, Han AW, Johnson AJA, Holmes SP. DADA2: High resolution sample inference from Illumina amplicon data. *Nat methods.* 2016;13(7):581-583. doi:10.1038/nmeth.3869
  
15. Parks DH, Chuvochina M, Chaumeil PA, Rinke C, Mussig AJ, Hugenholtz P. A complete domain-to-species taxonomy for Bacteria and Archaea. *Nat Biotechnol.* 2020;38(9):1079-1086. doi:10.1038/s41587-020-0501-8
  
16. Parks DH, Chuvochina M, Waite DW, Rinke C, Skarshewski A, Chaumeil PA, Hugenholtz P. A standardized bacterial taxonomy based on genome phylogeny substantially revises the tree of life. *Nat Biotechnol.* 2018;36(10):996-1004. doi:10.1038/nbt.4229
  
17. Reeder J, Huang M, Kaminker JS, Paulson JN. MicrobiomeExplorer: an R package for the analysis and visualization of microbial communities. *Bioinformatics.* 2020;37(9):1317-1318. doi:10.1093/bioinformatics/btaa838
  
18. Wickham H, Averick M, Bryan J, Chang W, McGowan L, François R, Grolemund G, Hayes A, Henry L, Hester J, Kuhn M, Pedersen T, Miller E, Bache S, Müller K, Ooms J, Robinson D, Seidel D, Spinu V, Takahashi K, Vaughan D, Wilke C, Woo K, Yutani H. Welcome to the Tidyverse. *J Open Source Softw.* 2019;4(43):1686. doi:10.21105/joss.01686

19. Kolmogorov M, Bickhart DM, Behsaz B, Gurevich A, Rayko M, Shin SB, Kuhn K, Yuan J, Pevnikov E, Smith TPL, Pevzner PA. metaFlye: scalable long-read metagenome assembly using repeat graphs. *Nat Methods*. 2020;17(11):1103-1110. doi:10.1038/s41592-020-00971-x
20. Chen L, Yang J, Yu J, Yao Z, Sun L, Shen Y, Jin Q. VFDB: a reference database for bacterial virulence factors. *Nucleic Acids Res*. 2005;33(suppl\_1):D325-D328. doi:10.1093/nar/gki008
21. Bankevich A, Nurk S, Antipov D, Gurevich AA, Dvorkin M, Kulikov AS, Lesin VM, Nikolenko SI, Pham S, Prjibelski AD, Pyshkin AV, Sirotkin AV, Vyahhi N, Tesler G, Alekseyev MA, Pevzner PA. SPAdes: A New Genome Assembly Algorithm and Its Applications to Single-Cell Sequencing. *J Comput Biol*. 2012;19(5):455-477. doi:10.1089/cmb.2012.0021
22. Alikhan NF, Petty NK, Zakour NLB, Beatson SA. BLAST Ring Image Generator (BRIG): simple prokaryote genome comparisons. *BMC Genom*. 2011;12(1):402-402. doi:10.1186/1471-2164-12-402
23. Seemann T. Prokka: rapid prokaryotic genome annotation. *Bioinformatics*. 2014;30(14):2068-2069. doi:10.1093/bioinformatics/btu153
24. Parks DH, Imelfort M, Skennerton CT, Hugenholtz P, Tyson GW. CheckM: assessing the quality of microbial genomes recovered from isolates, single cells, and metagenomes. *Genome Res*. 2015;25(7):1043-1055. doi:10.1101/gr.186072.114
25. Page AJ, Cummins CA, Hunt M, Wong VK, Reuter S, Holden MTG, Fookes M, Falush D, Keane JA, Parkhill J. Roary: rapid large-scale prokaryote pan genome analysis. *Bioinformatics*. 2015;31(22):3691-3693. doi:10.1093/bioinformatics/btv421
26. Stamatakis A. RAxML version 8: a tool for phylogenetic analysis and post-analysis of large phylogenies. *Bioinformatics*. 2014;30(9):1312-1313. doi:10.1093/bioinformatics/btu033
27. Fujii M, Matano M, Toshimitsu K, Takano A, Mikami Y, Nishikori S, Sugimoto S, Sato T. Human Intestinal Organoids Maintain Self-Renewal Capacity and Cellular Diversity in Niche-Inspired Culture Condition. *Cell Stem Cell*. 2018;23(6):787-793.e6. doi:10.1016/j.stem.2018.11.016
28. Jung M, Dourado M, Maksymetz J, Jacobson A, Laufer BI, Baca M, Foreman O, Hackos DH, Riol-Blanco L, Kaminker JS. Cross-species transcriptomic atlas of dorsal root ganglia reveals species-specific programs for sensory function. *Nat Commun*. 2023;14(1):366. doi:10.1038/s41467-023-36014-0
29. Byrd AL, Liu M, Fujimura KE, Lyalina S, Nagarkar DR, Charbit B, Bergstedt J, Patin E, Harrison OJ, Quintana-Murci L, Mellman I, Duffy D, Albert ML, Consortium MI. Gut microbiome stability and dynamics in healthy donors and patients with non-gastrointestinal cancers. *J Exp Med*. 2020;218(1):e20200606. doi:10.1084/jem.20200606
30. Zeevi D, Korem T, Zmora N, Israeli D, Rothschild D, Weinberger A, Ben-Yacov O, Lador D, Avnit-Sagi T, Lotan-Pompan M, Suez J, Mahdi JA, Matot E, Malka G, Kosower N, Rein M, Zilberman-Schapira G, Dohnalová L, Pevsner-Fischer M, Bikovsky R, Halpern Z, Elinav E,

Segal E. Personalized Nutrition by Prediction of Glycemic Responses. *Cell*. 2015;163(5):1079-1094. doi:10.1016/j.cell.2015.11.001

31. Sandborn WJ, Panés J, Danese S, Sharafali Z, Hassanali A, Jacob-Moffatt R, Eden C, Daperno M, Valentine JF, Laharie D, Baía C, Atreya R, Panaccione R, Rydzewska G, Aguilar H, Vermeire S, Group BS. Etrolizumab as induction and maintenance therapy in patients with moderately to severely active Crohn's disease (BERGAMOT): a randomised, placebo-controlled, double-blind, phase 3 trial. *Lancet Gastroenterol Hepatol*. 2023;8(1):43-55. doi:10.1016/s2468-1253(22)00303-x

32. Vermeire S, Lakatos PL, Ritter T, Hanauer S, Bressler B, Khanna R, Isaacs K, Shah S, Kadva A, Tyrrell H, Oh YS, Tole S, Chai A, Pulley J, Eden C, Zhang W, Feagan BG, Group LS, Abraham P, Júnior MAC, Aguilar H, Ahmed T, Altorjay I, Andersen V, Arai R, Arnold H, Ausk K, Axler J, Ayub K, Balekuduru A, Neto GB, Bassan I, Behm B, Bekal P, Bhatia S, Bod B, Mello CEB, Brandeburova J, Breedt J, Bressler B, Chohey I, Connor M, Corlin R, Hernandez CAC, De A, Rolim A de S, Boratto SDF, Dixon T, Poli DD, Dresner D, Vall GAD, Ebert M, Eehalt R, Ertan A, Valencia RE, Etzel J, Fallingborg J, Feagan B, Fedurco M, Castro EF, Borges VF de A, Finklestein M, Fischer A, Fleisher M, Rendon ARF, Fogel R, Junior OF, Freedland C, Gatof D, Gill K, Glerup H, Gokak V, Goldin E, Jaramillo HAG, Gupta N, Gurzo Z, Gyryna O, Habeeb MA, Hanauer S, Hardi R, Harlan W, Hemaïdan A, Heyman M, Hoffmann P, Holderman W, Holtkamp-Endemann F, Horvat G, Isaacs K, Israeli E, Miszputen SJ, Jensen S, Johnson K, Jones J, Junior O, Kadleckova B, Kalla M, Kallo Z, Karyotakis N, et al. Etrolizumab for maintenance therapy in patients with moderately to severely active ulcerative colitis (LAUREL): a randomised, placebo-controlled, double-blind, phase 3 study. *Lancet Gastroenterol Hepatol*. 2022;7(1):28-37. doi:10.1016/s2468-1253(21)00295-8

33. Rubin DT, Dotan I, DuVall A, Bouhnik Y, Radford-Smith G, Higgins PDR, Mishkin DS, Arrisi P, Scalori A, Oh YS, Tole S, Chai A, Chamberlain-James K, Lacey S, McBride J, Panés J, Rustem A, Norasiah AB, Humberto A, Diego A, Hale A, Evangelos A, Olga A, Bagdadi A, Andres A, Ashwin A, Jane A, Tomasz A, Nathan A, Ozlen A, Mauro B, Jozef B, George B, Marko B, Andrey B, Guerino BN, Metin B, Curtis B, Stefan B, William B, Fatih B, Sudhir B, Andrzej B, Leonid B, Bahri B, Pavol B, Verle B, Julia B, Vladimir B, Francisco BP, Yoram B, James B, Tetiana B, Igor B, Ivan B, Jonathon C, Azlida CA, Tatiana C, Michael C, Ivan C, Dimitrios C, Shan CP, Galina C, Andrew C, Robert C, Mirjana C, Ulku D, Cezary DW, Olena D, Henry D, Elena D, Jelena D, Nik DJ, Julia D, Oleg D, Tomas D, Piotr D, Gerald D, Pedro DG, Aaron DG, Mikhail D, Craig E, Yusuf E, Galyna F, Oleksandr F, Olga F, Miroslav F, Roland F, Jorge F, Lorena FM, Lucky F, Bradley F, Keith F, Sergio F, Beata GW, Leonel GPF, Daniel GE, Nataliia G, et al. Etrolizumab versus adalimumab or placebo as induction therapy for moderately to severely active ulcerative colitis (HIBISCUS): two phase 3 randomised, controlled trials. *Lancet Gastroenterol Hepatol*. 2022;7(1):17-27. doi:10.1016/s2468-1253(21)00338-1

34. Pasolli E, Schiffer L, Manghi P, Renson A, Obenchain V, Truong DT, Beghini F, Malik F, Ramos M, Dowd JB, Huttenhower C, Morgan M, Segata N, Waldron L. Accessible, curated metagenomic data through ExperimentHub. *Nat methods*. 2017;14(11):1023-1024. doi:10.1038/nmeth.4468

35. Geier RR, Rehberger TG, Smith AH. Comparative Genomics of *Clostridium perfringens* Reveals Patterns of Host-Associated Phylogenetic Clades and Virulence Factors. *Front Microbiol*. 2021;12:649953. doi:10.3389/fmicb.2021.649953

36. Ohtani K, Yuan Y, Hassan S, Wang R, Wang Y, Shimizu T. Virulence gene regulation by the agr system in *Clostridium perfringens*. *J Bacteriol.* 2009;191(12):3919-3927. doi:10.1128/jb.01455-08
37. Nagpal R, Ogata K, Tsuji H, Matsuda K, Takahashi T, Nomoto K, Suzuki Y, Kawashima K, Nagata S, Yamashiro Y. Sensitive quantification of *Clostridium perfringens* in human feces by quantitative real-time PCR targeting alpha-toxin and enterotoxin genes. *Bmc Microbiol.* 2015;15(1):219. doi:10.1186/s12866-015-0561-y
38. Asnicar F, Weingart G, Tickle TL, Huttenhower C, Segata N. Compact graphical representation of phylogenetic data and metadata with GraPhIAn. *PeerJ.* 2015;3:e1029. doi:10.7717/peerj.1029
39. Zimmermann M, Zimmermann-Kogadeeva M, Wegmann R, Goodman AL. Mapping human microbiome drug metabolism by gut bacteria and their genes. *Nature.* 2019;570(7762):462-467. doi:10.1038/s41586-019-1291-3
